# Supplementary material
Source: publisher site journal article supplement (https://www.spandidos-publications.com/7916/downloadSupplementary)
Supplement: Supplementary file 1 [file downloadSupplementary]

## Sheet: Sheet 1
Table SII. DEGs in Hesperadin-treated AGS cells.
gene_id	H_readcount	NC_readcount	log2FoldChange	pvalue	padj	H-1	H-2	H-3	NC-1	NC-2	NC-3	symbol	description
ENSG00000159388	15693.3	3837.35	2.0324	1.6734e-84	5.0261e-80	155.803	135.433	127.208	34.746	39.0244	33.4685	BTG2	BTG anti-proliferation factor 2 [Source:HGNC Symbol;Acc:HGNC:1131]
ENSG00000124762	33570.1	6840.63	2.2949	2.4276e-80	3.6458e-76	332.03	248.645	242.66	61.2714	55.0297	59.5216	CDKN1A	cyclin dependent kinase inhibitor 1A [Source:HGNC Symbol;Acc:HGNC:1784]
ENSG00000161513	6103.62	2032.96	1.5857	7.1696e-62	7.1782e-58	42.6959	41.555	40.4114	15.4256	13.5754	14.49	FDXR	ferredoxin reductase [Source:HGNC Symbol;Acc:HGNC:3642]
ENSG00000065618	3709.19	1126.21	1.7197	2.637e-59	1.9802e-55	13.6092	13.5207	11.9083	4.48635	3.96558	3.95254	COL17A1	collagen type XVII alpha 1 chain [Source:HGNC Symbol;Acc:HGNC:2194]
ENSG00000060656	7567.51	2859.9	1.4035	1.8971e-57	1.1396e-53	28.3572	27.9862	26.9127	11.1742	10.5349	11.2568	PTPRU	protein tyrosine phosphatase receptor type U [Source:HGNC Symbol;Acc:HGNC:9683]
ENSG00000079385	3354.05	1100.2	1.608	4.5349e-56	2.2702e-52	15.5022	14.3357	14.7502	5.38739	4.9159	5.02406	CEACAM1	CEA cell adhesion molecule 1 [Source:HGNC Symbol;Acc:HGNC:1814]
ENSG00000143217	1302.93	291.59	2.1579	3.3386e-49	1.4325e-45	11.021	8.76789	7.91247	2.1382	2.06722	2.29092	NECTIN4	nectin cell adhesion molecule 4 [Source:HGNC Symbol;Acc:HGNC:19688]
ENSG00000149591	485.12	1796.56	-1.8891	2.1059e-48	7.9068e-45	1.75199	1.66388	2.01996	7.59957	6.40023	7.11578	TAGLN	transgelin [Source:HGNC Symbol;Acc:HGNC:11553]
ENSG00000057657	1467.98	267.84	2.4534	1.0145e-47	3.3857e-44	6.82613	5.14601	4.02831	0.939438	1.02762	1.09153	PRDM1	PR/SET domain 1 [Source:HGNC Symbol;Acc:HGNC:9346]
ENSG00000135679	18116.5	4374.13	2.0503	1.2445e-46	3.738e-43	68.2406	51.5954	40.6309	12.3691	14.5689	13.6567	MDM2	MDM2 proto-oncogene [Source:HGNC Symbol;Acc:HGNC:6973]
ENSG00000100979	5441.27	1995.75	1.4459	4.8576e-46	1.3264e-42	55.0754	51.7835	50.5375	20.1025	18.3219	22.0821	PLTP	phospholipid transfer protein [Source:HGNC Symbol;Acc:HGNC:9093]
ENSG00000129757	314.73	1382.97	-2.1359	1.0612e-45	2.6561e-42	2.62979	2.88456	3.79528	14.9778	13.0931	14.8711	CDKN1C	cyclin dependent kinase inhibitor 1C [Source:HGNC Symbol;Acc:HGNC:1786]
ENSG00000123384	7300.83	2985.03	1.29	5.2193e-45	1.2059e-41	8.30711	8.93542	8.493	3.37648	3.71311	3.94152	LRP1	LDL receptor related protein 1 [Source:HGNC Symbol;Acc:HGNC:6692]
ENSG00000197852	1731.43	545.39	1.6696	2.075e-42	4.4518e-39	6.20273	6.97249	6.73749	2.29744	2.35479	1.91653	INKA2	inka box actin regulator 2 [Source:HGNC Symbol;Acc:HGNC:28045]
ENSG00000100139	8242.2	3486.54	1.2409	2.4043e-42	4.8144e-39	30.368	28.0088	27.9685	12.7303	12.2542	13.3028	MICALL1	MICAL like 1 [Source:HGNC Symbol;Acc:HGNC:29804]
ENSG00000164938	3651.88	1313.23	1.4761	3.8055e-42	7.1438e-39	16.1408	17.4368	14.0591	5.41877	6.49495	6.02642	TP53INP1	tumor protein p53 inducible nuclear protein 1 [Source:HGNC Symbol;Acc:HGNC:18022]
ENSG00000107984	2427.05	672.56	1.8515	2.1069e-41	3.7226e-38	32.4244	26.2792	21.6821	7.95594	7.67822	7.68814	DKK1	dickkopf WNT signaling pathway inhibitor 1 [Source:HGNC Symbol;Acc:HGNC:2891]
ENSG00000110092	35348.8	13199	1.4213	8.9891e-41	1.5e-37	209.76	167.121	168.613	71.6913	73.6034	68.2471	CCND1	cyclin D1 [Source:HGNC Symbol;Acc:HGNC:1582]
ENSG00000055163	844.41	203.38	2.0469	1.2338e-40	1.9505e-37	2.02025	1.89178	1.99703	0.532414	0.403945	0.555211	CYFIP2	cytoplasmic FMR1 interacting protein 2 [Source:HGNC Symbol;Acc:HGNC:13760]
ENSG00000165272	7647.28	3191.99	1.2602	3.3808e-40	5.0773e-37	63.9633	61.4635	67.5161	28.5684	26.7523	29.1387	AQP3	aquaporin 3 (Gill blood group) [Source:HGNC Symbol;Acc:HGNC:636]
ENSG00000172667	2596.03	1014.92	1.3554	2.2528e-38	3.2222e-35	5.25923	6.16954	5.47646	2.15855	2.43436	2.33062	ZMAT3	zinc finger matrin-type 3 [Source:HGNC Symbol;Acc:HGNC:29983]
ENSG00000185088	8627.36	3711.32	1.2171	3.8778e-37	5.2943e-34	23.1382	23.2065	25.4594	11.2668	10.6848	10.4326	RPS27L	ribosomal protein S27 like [Source:HGNC Symbol;Acc:HGNC:18476]
ENSG00000117650	1421.56	3573.95	-1.3301	1.1012e-36	1.4381e-33	11.1474	12.6416	10.0271	27.5502	30.613	30.8413	NEK2	NIMA related kinase 2 [Source:HGNC Symbol;Acc:HGNC:7745]
ENSG00000155066	3499.46	1395.58	1.3259	3.4597e-36	4.3298e-33	13.3387	13.579	15.4377	5.68041	5.87129	6.17356	PROM2	prominin 2 [Source:HGNC Symbol;Acc:HGNC:20685]
ENSG00000132967	6849.72	18724.1	-1.4506	2.0397e-35	2.3732e-32	143.262	169.087	141.439	424.6	504.926	368.846	HMGB1P5	high mobility group box 1 pseudogene 5 [Source:HGNC Symbol;Acc:HGNC:4997]
ENSG00000029534	5978.74	2743.3	1.1241	2.0543e-35	2.3732e-32	12.7242	14.5549	13.4479	6.349	6.71336	6.51415	ANK1	ankyrin 1 [Source:HGNC Symbol;Acc:HGNC:492]
ENSG00000066279	2384.64	6617.14	-1.4724	1.0882e-34	1.2105e-31	4.40613	5.36151	4.85856	11.5728	15.6678	15.3214	ASPM	assembly factor for spindle microtubules [Source:HGNC Symbol;Acc:HGNC:19048]
ENSG00000177595	1577.99	591.16	1.4164	1.5722e-34	1.6865e-31	6.91298	6.86332	6.0481	2.35444	2.71602	2.71307	PIDD1	p53-induced death domain protein 1 [Source:HGNC Symbol;Acc:HGNC:16491]
ENSG00000069812	1022.05	321	1.6701	1.6789e-34	1.7303e-31	5.19768	4.65216	4.05278	1.52507	1.49574	1.55244	HES2	hes family bHLH transcription factor 2 [Source:HGNC Symbol;Acc:HGNC:16005]
ENSG00000177106	19821.5	9887.89	1.0032	1.7282e-34	1.7303e-31	85.8752	85.0309	85.1604	44.7928	43.4784	45.6137	EPS8L2	EPS8 like 2 [Source:HGNC Symbol;Acc:HGNC:21296]
ENSG00000177076	914.41	289.52	1.6598	4.9566e-34	4.8025e-31	8.02526	8.96867	7.27969	2.83812	2.6325	2.56818	ACER2	alkaline ceramidase 2 [Source:HGNC Symbol;Acc:HGNC:23675]
ENSG00000131747	7347.3	16926.5	-1.2039	6.9537e-34	6.5269e-31	26.0721	31.729	27.0341	62.7152	74.2806	67.6972	TOP2A	DNA topoisomerase II alpha [Source:HGNC Symbol;Acc:HGNC:11989]
ENSG00000125657	3063.24	1005.91	1.6054	2.2463e-33	2.0446e-30	38.2835	46.4673	52.9291	16.5969	13.9772	16.8306	TNFSF9	TNF superfamily member 9 [Source:HGNC Symbol;Acc:HGNC:11939]
ENSG00000080546	2526.58	1081.32	1.2232	6.4779e-33	5.7226e-30	11.846	12.6329	11.802	5.60894	5.02173	5.63078	SESN1	sestrin 1 [Source:HGNC Symbol;Acc:HGNC:21595]
ENSG00000237975	772.22	237.76	1.7043	9.3814e-33	7.8272e-30	1.19478	1.33783	1.25827	0.403233	0.450914	0.368542	FLG-AS1	FLG antisense RNA 1 [Source:HGNC Symbol;Acc:HGNC:27913]
ENSG00000087088	11842.6	5016.41	1.239	9.174e-33	7.8272e-30	110.03	105.559	120.534	52.589	45.1131	51.6057	BAX	BCL2 associated X, apoptosis regulator [Source:HGNC Symbol;Acc:HGNC:959]
ENSG00000135114	9869.52	4479.09	1.14	9.8657e-33	8.0088e-30	41.5706	36.6017	36.6724	18.7018	18.5098	17.4131	OASL	2'-5'-oligoadenylate synthetase like [Source:HGNC Symbol;Acc:HGNC:8090]
ENSG00000115129	5320.44	2313.6	1.2014	1.4489e-32	1.1453e-29	61.7041	54.3546	53.0711	26.972	25.0496	25.0327	TP53I3	tumor protein p53 inducible protein 3 [Source:HGNC Symbol;Acc:HGNC:19373]
ENSG00000117724	4103.79	11148.1	-1.4416	1.9527e-32	1.5039e-29	8.79443	9.7369	7.35907	21.154	28.7721	23.7214	CENPF	centromere protein F [Source:HGNC Symbol;Acc:HGNC:1857]
ENSG00000026103	878.7	206.44	2.0875	4.6924e-31	3.5235e-28	4.94016	3.50485	3.13498	0.822288	0.961159	1.07068	FAS	Fas cell surface death receptor [Source:HGNC Symbol;Acc:HGNC:11920]
ENSG00000100290	1166.41	310.22	1.9084	5.8355e-31	4.275e-28	36.3836	26.0429	27.6458	9.67246	6.94347	8.48123	BIK	BCL2 interacting killer [Source:HGNC Symbol;Acc:HGNC:1051]
ENSG00000126787	2324.21	5694.42	-1.2927	7.5695e-31	5.4133e-28	13.8823	17.3248	16.3155	35.9621	44.9509	41.1493	DLGAP5	DLG associated protein 5 [Source:HGNC Symbol;Acc:HGNC:16864]
ENSG00000005884	18912	7973.6	1.2459	8.6588e-31	6.0483e-28	54.9026	43.7893	43.0843	21.1953	20.1882	21.2729	ITGA3	integrin subunit alpha 3 [Source:HGNC Symbol;Acc:HGNC:6139]
ENSG00000189403	20917.1	42713.5	-1.03	1.3824e-30	9.4365e-28	65.1848	70.8461	63.8873	137.1	155.67	134.887	HMGB1	high mobility group box 1 [Source:HGNC Symbol;Acc:HGNC:4983]
ENSG00000168078	1790.26	3893.53	-1.1205	1.5492e-30	1.0341e-27	19.3996	21.2569	20.6186	44.6439	50.2861	44.7442	PBK	PDZ binding kinase [Source:HGNC Symbol;Acc:HGNC:18282]
ENSG00000197191	1194.16	443.8	1.4253	3.5457e-30	2.2659e-27	23.2281	23.3444	20.9375	9.13171	7.84609	9.29148	CYSRT1	cysteine rich tail 1 [Source:HGNC Symbol;Acc:HGNC:30529]
ENSG00000181026	9870.83	4055.49	1.2833	4.0595e-30	2.5402e-27	47.5402	37.5803	36.2661	17.8502	17.2891	17.1268	AEN	apoptosis enhancing nuclease [Source:HGNC Symbol;Acc:HGNC:25722]
ENSG00000095303	1418.37	585.39	1.2757	5.8857e-30	3.6078e-27	5.76698	6.43409	5.83641	2.61734	2.50323	2.67541	PTGS1	prostaglandin-endoperoxide synthase 1 [Source:HGNC Symbol;Acc:HGNC:9604]
ENSG00000124067	3633.14	1528.65	1.248	7.5183e-30	4.5164e-27	11.9424	10.1274	10.103	4.68176	4.4132	5.09743	SLC12A4	solute carrier family 12 member 4 [Source:HGNC Symbol;Acc:HGNC:10913]
ENSG00000100526	2712.09	5857.44	-1.1109	2.8617e-29	1.653e-26	32.4039	40.3702	35.9121	78.9053	83.0008	83.9263	CDKN3	cyclin dependent kinase inhibitor 3 [Source:HGNC Symbol;Acc:HGNC:1791]
ENSG00000244509	7423.7	3354.03	1.1457	4.7336e-29	2.6826e-26	65.621	67.2405	73.3774	33.8327	29.534	34.3245	APOBEC3C	apolipoprotein B mRNA editing enzyme catalytic subunit 3C [Source:HGNC Symbol;Acc:HGNC:17353]
ENSG00000182795	6281.21	2771.98	1.18	9.212e-29	5.1239e-26	31.1962	25.098	27.5531	13.0173	12.714	13.084	C1orf116	chromosome 1 open reading frame 116 [Source:HGNC Symbol;Acc:HGNC:28667]
ENSG00000161714	11366.8	5682.64	1.0002	1.5568e-28	8.5016e-26	44.0639	39.6111	40.1004	21.9849	21.344	21.533	PLCD3	phospholipase C delta 3 [Source:HGNC Symbol;Acc:HGNC:9061]
ENSG00000140465	1311.73	371.92	1.8177	1.632e-28	8.7531e-26	12.1168	9.19766	7.39549	3.04259	2.64959	2.82722	CYP1A1	cytochrome P450 family 1 subfamily A member 1 [Source:HGNC Symbol;Acc:HGNC:2595]
ENSG00000080824	27342	58549.8	-1.0985	2.4956e-28	1.3151e-25	128.546	146.65	119.678	267.188	326.214	292.134	HSP90AA1	heat shock protein 90 alpha family class A member 1 [Source:HGNC Symbol;Acc:HGNC:5253]
ENSG00000198535	739.9	241.14	1.6161	2.8969e-28	1.5002e-25	5.81672	5.19512	4.77952	1.63698	1.82884	1.9302	C2CD4A	C2 calcium dependent domain containing 4A [Source:HGNC Symbol;Acc:HGNC:33627]
ENSG00000101384	17667.6	8604.66	1.0381	3.565e-28	1.8149e-25	46.2889	51.5403	42.0376	23.0693	25.3514	22.8829	JAG1	jagged canonical Notch ligand 1 [Source:HGNC Symbol;Acc:HGNC:6188]
ENSG00000260912	471.33	128.56	1.8714	3.7548e-28	1.8796e-25	6.10599	5.57256	5.94105	1.77298	1.54148	1.72333	-	novel transcript, overlapping ACER2
ENSG00000131669	1792.4	746.63	1.2625	5.5144e-28	2.7153e-25	18.5644	15.9675	16.046	7.46916	7.02581	7.58983	NINJ1	ninjurin 1 [Source:HGNC Symbol;Acc:HGNC:7824]
ENSG00000145386	2892.15	5937.11	-1.0378	8.4932e-28	4.1146e-25	23.8691	28.5511	25.0204	55.2084	54.0217	57.2083	CCNA2	cyclin A2 [Source:HGNC Symbol;Acc:HGNC:1578]
ENSG00000147251	638.96	1725.85	-1.4336	8.7274e-28	4.1609e-25	2.4622	2.61901	1.83731	6.03394	6.77565	6.74155	DOCK11	dedicator of cytokinesis 11 [Source:HGNC Symbol;Acc:HGNC:23483]
ENSG00000090776	1482.25	584.86	1.3417	2.0237e-27	9.4977e-25	12.322	10.36	10.294	4.17355	4.75948	4.71607	EFNB1	ephrin B1 [Source:HGNC Symbol;Acc:HGNC:3226]
ENSG00000118193	819.88	2024.47	-1.3037	4.2406e-27	1.9299e-24	2.79505	3.08039	2.40077	6.388	7.90266	7.10746	KIF14	kinesin family member 14 [Source:HGNC Symbol;Acc:HGNC:19181]
ENSG00000065357	1025.7	383.72	1.4176	7.874e-27	3.5299e-24	2.73381	2.3171	2.41092	1.02262	0.923881	0.979622	DGKA	diacylglycerol kinase alpha [Source:HGNC Symbol;Acc:HGNC:2849]
ENSG00000143631	1280.27	384.76	1.7293	1.7651e-26	7.7966e-24	2.33302	2.77576	2.25854	0.85617	0.558779	0.899989	FLG	filaggrin [Source:HGNC Symbol;Acc:HGNC:3748]
ENSG00000113810	2857.05	6718.78	-1.2335	3.5947e-26	1.5424e-23	8.95515	9.61345	7.2034	19.1664	23.8751	20.4001	SMC4	structural maintenance of chromosomes 4 [Source:HGNC Symbol;Acc:HGNC:14013]
ENSG00000188707	5151.65	2418.76	1.0905	5.4358e-26	2.2996e-23	21.7378	27.582	23.9265	12.1882	11.6163	12.1887	ZBED6CL	ZBED6 C-terminal like [Source:HGNC Symbol;Acc:HGNC:21720]
ENSG00000108846	3984.08	1968.18	1.0172	9.0556e-26	3.7777e-23	10.8839	10.2578	9.32881	5.04148	5.29565	5.43659	ABCC3	ATP binding cassette subfamily C member 3 [Source:HGNC Symbol;Acc:HGNC:54]
ENSG00000168918	483.71	139.24	1.7959	3.3977e-25	1.376e-22	1.32191	1.41311	1.3616	0.482167	0.36637	0.385358	INPP5D	inositol polyphosphate-5-phosphatase D [Source:HGNC Symbol;Acc:HGNC:6079]
ENSG00000011426	4121.69	9096.65	-1.142	3.436e-25	1.376e-22	15.2378	19.7967	15.5814	35.4458	42.3213	39.1643	ANLN	anillin actin binding protein [Source:HGNC Symbol;Acc:HGNC:14082]
ENSG00000137807	1925.35	4038.81	-1.0688	1.0211e-24	3.983e-22	6.41623	8.19227	6.94204	15.707	15.9511	15.6546	KIF23	kinesin family member 23 [Source:HGNC Symbol;Acc:HGNC:6392]
ENSG00000138160	2162.12	5166.77	-1.2567	1.6907e-24	6.5104e-22	10.1077	11.3794	8.43609	21.0939	27.985	25.7987	KIF11	kinesin family member 11 [Source:HGNC Symbol;Acc:HGNC:6388]
ENSG00000102243	540.03	169.43	1.6773	4.5651e-24	1.7139e-21	8.55581	8.82407	9.46189	3.22204	3.0741	2.52722	VGLL1	vestigial like family member 1 [Source:HGNC Symbol;Acc:HGNC:20985]
ENSG00000148773	15539.2	36233.1	-1.2214	5.195e-24	1.9264e-21	23.3501	34.8591	30.827	70.0388	74.3445	72.9667	MKI67	marker of proliferation Ki-67 [Source:HGNC Symbol;Acc:HGNC:7107]
ENSG00000198826	1856.1	4292.61	-1.2093	6.3534e-24	2.3272e-21	7.35589	8.03878	5.94551	15.4978	19.3959	16.7653	ARHGAP11A	Rho GTPase activating protein 11A [Source:HGNC Symbol;Acc:HGNC:15783]
ENSG00000100647	2742.2	1231.4	1.1554	8.8138e-24	3.1895e-21	13.1933	11.1327	10.2422	5.47094	5.51059	5.28214	SUSD6	sushi domain containing 6 [Source:HGNC Symbol;Acc:HGNC:19956]
ENSG00000156970	2618.32	5558.27	-1.0859	1.0313e-23	3.6443e-21	12.8507	16.9432	13.4112	31.0507	33.2424	31.6655	BUB1B	BUB1 mitotic checkpoint serine/threonine kinase B [Source:HGNC Symbol;Acc:HGNC:1149]
ENSG00000137812	1041.89	2579.79	-1.308	1.5074e-23	5.2647e-21	2.74184	2.73878	2.00501	5.60946	7.00957	6.7897	KNL1	kinetochore scaffold 1 [Source:HGNC Symbol;Acc:HGNC:24054]
ENSG00000074416	1953.51	963.84	1.0189	2.2034e-23	7.6072e-21	4.11132	3.93194	4.07029	2.04548	2.08086	2.14084	MGLL	monoglyceride lipase [Source:HGNC Symbol;Acc:HGNC:17038]
ENSG00000155918	356.41	67.3	2.4038	4.0539e-23	1.3837e-20	8.84005	5.27642	5.33042	1.15451	1.32772	1.37228	RAET1L	retinoic acid early transcript 1L [Source:HGNC Symbol;Acc:HGNC:16798]
ENSG00000116701	693.61	266.09	1.3831	1.9242e-22	6.4216e-20	6.05107	5.83701	5.52188	2.07084	2.52331	2.41038	NCF2	neutrophil cytosolic factor 2 [Source:HGNC Symbol;Acc:HGNC:7661]
ENSG00000012048	1146.67	2656	-1.2113	3.6698e-22	1.2113e-19	3.11359	3.3857	2.57429	6.52592	8.44321	7.03517	BRCA1	BRCA1 DNA repair associated [Source:HGNC Symbol;Acc:HGNC:1100]
ENSG00000076382	2441.22	4922.49	-1.0118	4.1351e-22	1.35e-19	9.90364	12.5961	11.9089	23.892	24.3923	24.3935	SPAG5	sperm associated antigen 5 [Source:HGNC Symbol;Acc:HGNC:13452]
ENSG00000163554	278.65	701.2	-1.3311	9.4914e-22	3.0654e-19	0.7191	0.697508	0.611157	1.70598	1.85492	1.78472	SPTA1	spectrin alpha, erythrocytic 1 [Source:HGNC Symbol;Acc:HGNC:11272]
ENSG00000275342	6843.77	2457.2	1.4778	1.0241e-21	3.2723e-19	46.5485	30.3618	26.9164	13.0209	13.0976	12.9494	PRAG1	PEAK1 related, kinase-activating pseudokinase 1 [Source:HGNC Symbol;Acc:HGNC:25438]
ENSG00000196220	772.54	311.19	1.309	1.6335e-21	5.1646e-19	1.02865	1.01671	0.956191	0.381444	0.41456	0.471762	SRGAP3	SLIT-ROBO Rho GTPase activating protein 3 [Source:HGNC Symbol;Acc:HGNC:19744]
ENSG00000112984	3611.28	7292.06	-1.0138	1.9662e-21	6.1516e-19	19.5225	24.6993	24.7	47.148	49.5477	49.1664	KIF20A	kinesin family member 20A [Source:HGNC Symbol;Acc:HGNC:9787]
ENSG00000012171	1489.49	720.41	1.0466	3.1674e-21	9.8078e-19	6.49937	6.60417	5.89055	3.21991	3.04581	3.35531	SEMA3B	semaphorin 3B [Source:HGNC Symbol;Acc:HGNC:10724]
ENSG00000249859	814.77	247.11	1.7213	6.3446e-21	1.9249e-18	1.02834	0.795767	0.578867	0.241029	0.262157	0.259861	PVT1	Pvt1 oncogene [Source:HGNC Symbol;Acc:HGNC:9709]
ENSG00000119922	6459.25	2852.01	1.1796	7.5175e-21	2.258e-18	42.725	37.9386	29.2349	15.3942	18.4009	17.0268	IFIT2	interferon induced protein with tetratricopeptide repeats 2 [Source:HGNC Symbol;Acc:HGNC:5409]
ENSG00000172927	4928.13	1886.26	1.3854	8.9174e-21	2.6259e-18	41.8399	25.7361	28.9621	12.9166	12.6512	13.2111	MYEOV	myeloma overexpressed [Source:HGNC Symbol;Acc:HGNC:7563]
ENSG00000224411	539.66	1226.1	-1.1833	9.8859e-21	2.8829e-18	5.55438	5.96249	6.53438	15.2599	14.4278	13.299	HSP90AA2P	heat shock protein 90 alpha family class A member 2, pseudogene [Source:HGNC Symbol;Acc:HGNC:5256]
ENSG00000167741	448.49	138	1.6979	1.0216e-20	2.9504e-18	2.94523	3.4968	3.97787	1.10215	1.07323	1.18816	GGT6	gamma-glutamyltransferase 6 [Source:HGNC Symbol;Acc:HGNC:26891]
ENSG00000231290	349.27	820.1	-1.2304	2.971e-20	8.3399e-18	1.41166	1.27494	1.32226	3.34788	3.43549	3.08442	APCDD1L-DT	APCDD1L divergent transcript [Source:HGNC Symbol;Acc:HGNC:27152]
ENSG00000171552	18591.5	7458.98	1.3175	4.7412e-20	1.2946e-17	141.723	92.6697	91.0262	48.0558	42.9561	45.8338	BCL2L1	BCL2 like 1 [Source:HGNC Symbol;Acc:HGNC:992]
ENSG00000224032	1085.33	467.2	1.2149	7.1075e-20	1.8892e-17	7.78733	6.35882	6.28749	3.09528	2.93355	3.19181	EPB41L4A-AS1	EPB41L4A antisense RNA 1 [Source:HGNC Symbol;Acc:HGNC:30749]
ENSG00000109805	1573.63	3166.09	-1.0084	7.5032e-20	1.9769e-17	7.74462	8.59435	7.54674	14.4996	18.6227	17.2502	NCAPG	non-SMC condensin I complex subunit G [Source:HGNC Symbol;Acc:HGNC:24304]
ENSG00000163507	861.8	1807.04	-1.068	1.2509e-19	3.184e-17	4.56149	5.26767	4.01639	9.46463	10.8037	10.1139	CIP2A	cellular inhibitor of PP2A [Source:HGNC Symbol;Acc:HGNC:29302]
ENSG00000196878	15629.6	6791.23	1.2024	1.3291e-19	3.3547e-17	103.604	74.4037	69.1847	37.8253	34.9636	39.7834	LAMB3	laminin subunit beta 3 [Source:HGNC Symbol;Acc:HGNC:6490]
ENSG00000179023	442.59	142.85	1.6336	2.0201e-19	4.9331e-17	2.53121	2.05786	1.86085	0.685597	0.780518	0.715976	KLHDC7A	kelch domain containing 7A [Source:HGNC Symbol;Acc:HGNC:26791]
ENSG00000204866	362.19	113.87	1.6643	2.0733e-19	5.022e-17	3.46815	3.65136	3.84968	1.11579	1.14868	1.35355	IGFL2	IGF like family member 2 [Source:HGNC Symbol;Acc:HGNC:32929]
ENSG00000112972	4398.15	10394.5	-1.2407	2.4474e-19	5.8808e-17	12.2266	17.5445	18.996	40.2417	43.5451	37.036	HMGCS1	3-hydroxy-3-methylglutaryl-CoA synthase 1 [Source:HGNC Symbol;Acc:HGNC:5007]
ENSG00000114378	780.98	321.46	1.2784	2.4968e-19	5.9518e-17	6.2615	5.71765	6.60653	2.81107	2.42517	2.78744	HYAL1	hyaluronidase 1 [Source:HGNC Symbol;Acc:HGNC:5320]
ENSG00000166130	966.86	414.47	1.2202	4.1769e-19	9.6506e-17	6.14095	6.14159	4.81399	2.49256	2.43747	2.74104	IKBIP	IKBKB interacting protein [Source:HGNC Symbol;Acc:HGNC:26430]
ENSG00000095383	2040.42	919.77	1.149	4.3623e-19	1.0002e-16	16.4567	12.2846	12.9213	6.32698	6.48412	6.89244	TBC1D2	TBC1 domain family member 2 [Source:HGNC Symbol;Acc:HGNC:18026]
ENSG00000138180	1941.94	3902.34	-1.0064	5.9594e-19	1.356e-16	12.8434	15.9145	14.6474	28.0571	34.4226	28.9172	CEP55	centrosomal protein 55 [Source:HGNC Symbol;Acc:HGNC:1161]
ENSG00000164105	645	1491.76	-1.209	6.03e-19	1.3618e-16	10.2499	14.6194	11.4267	29.3914	31.4702	26.9201	SAP30	Sin3A associated protein 30 [Source:HGNC Symbol;Acc:HGNC:10532]
ENSG00000100298	426.01	142.77	1.5769	7.346e-19	1.6344e-16	8.37715	7.65893	8.96248	3.26574	2.71182	2.80534	APOBEC3H	apolipoprotein B mRNA editing enzyme catalytic subunit 3H [Source:HGNC Symbol;Acc:HGNC:24100]
ENSG00000197461	1164.6	514.29	1.1784	7.7681e-19	1.7156e-16	7.08821	5.98514	7.51138	3.15791	3.09395	3.29282	PDGFA	platelet derived growth factor subunit A [Source:HGNC Symbol;Acc:HGNC:8799]
ENSG00000136824	1508.83	3386.6	-1.1662	1.1744e-18	2.5561e-16	6.0635	6.60211	4.5184	11.9045	15.1685	13.2846	SMC2	structural maintenance of chromosomes 2 [Source:HGNC Symbol;Acc:HGNC:14011]
ENSG00000152253	882.21	1855.66	-1.072	1.3177e-18	2.827e-16	10.398	12.228	12.8188	26.7633	27.6734	23.6988	SPC25	SPC25 component of NDC80 kinetochore complex [Source:HGNC Symbol;Acc:HGNC:24031]
ENSG00000072571	1010.06	2268.11	-1.1665	2.0525e-18	4.3415e-16	6.67899	6.40388	5.80813	11.9392	17.6102	14.954	HMMR	hyaluronan mediated motility receptor [Source:HGNC Symbol;Acc:HGNC:5012]
ENSG00000170835	224.21	55.8	2.0046	2.5242e-18	5.302e-16	2.20595	2.49471	2.2268	0.557915	0.610636	0.637851	CEL	carboxyl ester lipase [Source:HGNC Symbol;Acc:HGNC:1848]
ENSG00000113657	520.32	1107.57	-1.0909	4.2469e-18	8.737e-16	1.65743	1.78071	1.88702	3.71824	3.80999	4.36252	DPYSL3	dihydropyrimidinase like 3 [Source:HGNC Symbol;Acc:HGNC:3015]
ENSG00000184661	1314.58	2751.1	-1.0655	6.1121e-18	1.2404e-15	7.07661	9.88459	9.19691	17.9726	19.3604	20.0181	CDCA2	cell division cycle associated 2 [Source:HGNC Symbol;Acc:HGNC:14623]
ENSG00000174136	559.6	1137.57	-1.024	6.7294e-18	1.3565e-15	2.22584	2.05657	1.91113	4.3465	4.28612	4.56004	RGMB	repulsive guidance molecule BMP co-receptor b [Source:HGNC Symbol;Acc:HGNC:26896]
ENSG00000148219	552.25	220.99	1.3198	6.8806e-18	1.3778e-15	1.38785	1.20899	1.30221	0.510774	0.544482	0.581983	ASTN2	astrotactin 2 [Source:HGNC Symbol;Acc:HGNC:17021]
ENSG00000134222	946.78	1924.7	-1.0231	1.5537e-17	3.0109e-15	7.07109	8.36734	8.9277	18.0057	17.633	16.2748	PSRC1	proline and serine rich coiled-coil 1 [Source:HGNC Symbol;Acc:HGNC:24472]
ENSG00000276023	2840.28	1225.4	1.2117	1.616e-17	3.1114e-15	33.4454	25.4021	26.6845	14.5719	10.5189	13.5728	DUSP14	dual specificity phosphatase 14 [Source:HGNC Symbol;Acc:HGNC:17007]
ENSG00000169607	584.42	1393.12	-1.2529	2.1467e-17	4.0553e-15	2.9658	2.84536	2.06534	5.56418	7.39513	6.70462	CKAP2L	cytoskeleton associated protein 2 like [Source:HGNC Symbol;Acc:HGNC:26877]
ENSG00000197093	986.63	450.48	1.1271	2.2374e-17	4.2002e-15	7.48916	7.76195	6.9819	3.50927	3.09954	4.02417	GAL3ST4	galactose-3-O-sulfotransferase 4 [Source:HGNC Symbol;Acc:HGNC:24145]
ENSG00000230392	91.8	3.95	4.4847	3.7002e-17	6.8184e-15	0.839175	0.692949	0.786443	0.0172439	0.0312591	0.0564796	-	novel transcript
ENSG00000130066	6971.02	2932.7	1.2489	3.9981e-17	7.2342e-15	90.6948	58.5708	57.0695	30.5676	28.6059	31.8433	SAT1	spermidine/spermine N1-acetyltransferase 1 [Source:HGNC Symbol;Acc:HGNC:10540]
ENSG00000184371	952.37	454.15	1.0685	5.925e-17	1.0287e-14	4.46243	4.46205	4.43892	1.94273	2.38828	2.35481	CSF1	colony stimulating factor 1 [Source:HGNC Symbol;Acc:HGNC:2432]
ENSG00000204421	946.85	373.29	1.3384	8.3943e-17	1.4245e-14	19.1902	24.5395	25.5808	9.48639	7.87422	11.2837	LY6G6C	lymphocyte antigen 6 family member G6C [Source:HGNC Symbol;Acc:HGNC:13936]
ENSG00000174567	616.28	259.26	1.2455	1.0117e-16	1.6976e-14	15.8936	14.0046	14.1105	6.11378	6.0639	7.23999	GOLT1A	golgi transport 1A [Source:HGNC Symbol;Acc:HGNC:24766]
ENSG00000163121	879.21	404.65	1.1176	1.5766e-16	2.579e-14	7.83511	9.63027	8.47438	3.7988	4.11722	4.59182	NEURL3	neuralized E3 ubiquitin protein ligase 3 [Source:HGNC Symbol;Acc:HGNC:25162]
ENSG00000125966	585.02	189.17	1.6252	1.5799e-16	2.579e-14	4.31185	2.81509	2.69556	1.02524	1.03136	1.27567	MMP24	matrix metallopeptidase 24 [Source:HGNC Symbol;Acc:HGNC:7172]
ENSG00000118094	215.73	53.93	1.995	1.7625e-16	2.8462e-14	1.41596	1.9073	1.66625	0.456856	0.390287	0.457936	TREH	trehalase [Source:HGNC Symbol;Acc:HGNC:12266]
ENSG00000123080	459.99	931.25	-1.017	2.366e-16	3.7801e-14	3.54667	4.04756	3.61836	8.06401	8.11951	7.58232	CDKN2C	cyclin dependent kinase inhibitor 2C [Source:HGNC Symbol;Acc:HGNC:1789]
ENSG00000005001	2785.28	1083.28	1.3622	2.7664e-16	4.3964e-14	39.1663	24.5582	22.138	11.1022	11.5875	12.3277	PRSS22	serine protease 22 [Source:HGNC Symbol;Acc:HGNC:14368]
ENSG00000105290	463.38	176.58	1.389	2.9918e-16	4.7296e-14	3.10895	2.96277	3.53925	1.35271	1.15546	1.33381	APLP1	amyloid beta precursor like protein 1 [Source:HGNC Symbol;Acc:HGNC:597]
ENSG00000076356	724.84	318.26	1.1835	3.2388e-16	5.0932e-14	1.39521	1.24418	1.20859	0.557582	0.542574	0.671509	PLXNA2	plexin A2 [Source:HGNC Symbol;Acc:HGNC:9100]
ENSG00000163808	582.82	1290.55	-1.1464	3.625e-16	5.6709e-14	2.54536	3.25694	2.33034	5.49121	7.07208	6.28018	KIF15	kinesin family member 15 [Source:HGNC Symbol;Acc:HGNC:17273]
ENSG00000142765	1459.45	666.95	1.1298	4.5175e-16	7.0305e-14	7.7968	5.7488	5.65781	3.02977	3.09193	3.07996	SYTL1	synaptotagmin like 1 [Source:HGNC Symbol;Acc:HGNC:15584]
ENSG00000173846	1154.14	412.75	1.4848	5.3663e-16	8.2236e-14	11.657	7.21908	6.61577	3.11888	3.45964	2.97948	PLK3	polo like kinase 3 [Source:HGNC Symbol;Acc:HGNC:2154]
ENSG00000175938	504.18	204.44	1.3026	5.855e-16	8.9269e-14	4.49595	4.33199	5.18471	2.03094	1.9727	1.9583	ORAI3	ORAI calcium release-activated calcium modulator 3 [Source:HGNC Symbol;Acc:HGNC:28185]
ENSG00000102384	723.23	1479.08	-1.0318	6.266e-16	9.5053e-14	2.26427	2.98174	2.38299	4.93669	5.94868	5.44759	CENPI	centromere protein I [Source:HGNC Symbol;Acc:HGNC:3968]
ENSG00000163535	374.3	845.72	-1.1763	6.6443e-16	1.0029e-13	1.33578	1.61818	1.3934	2.8561	3.68587	3.75418	SGO2	shugoshin 2 [Source:HGNC Symbol;Acc:HGNC:30812]
ENSG00000092140	679.37	1443.22	-1.0868	8.4134e-16	1.251e-13	1.60538	2.1145	1.64942	3.41306	4.39448	4.13593	G2E3	G2/M-phase specific E3 ubiquitin protein ligase [Source:HGNC Symbol;Acc:HGNC:20338]
ENSG00000128510	518.95	193.34	1.4163	9.0895e-16	1.3383e-13	3.27039	3.07977	3.28133	1.14618	1.04844	1.57114	CPA4	carboxypeptidase A4 [Source:HGNC Symbol;Acc:HGNC:15740]
ENSG00000147168	111.47	13.92	3.0108	1.0439e-15	1.5147e-13	1.01014	0.81407	1.13675	0.108974	0.153645	0.126411	IL2RG	interleukin 2 receptor subunit gamma [Source:HGNC Symbol;Acc:HGNC:6010]
ENSG00000197019	1156.82	535.1	1.1108	1.1652e-15	1.6745e-13	14.9428	11.5249	14.2613	6.54263	6.1772	7.06103	SERTAD1	SERTA domain containing 1 [Source:HGNC Symbol;Acc:HGNC:17932]
ENSG00000146072	6615.44	2968.01	1.1562	2.8028e-15	3.9156e-13	59.1747	37.8082	38.1765	20.9436	20.7102	21.9505	TNFRSF21	TNF receptor superfamily member 21 [Source:HGNC Symbol;Acc:HGNC:13469]
ENSG00000140443	716.09	350.64	1.0313	5.1213e-15	6.9919e-13	1.30704	1.28008	1.1898	0.64903	0.662684	0.625665	IGF1R	insulin like growth factor 1 receptor [Source:HGNC Symbol;Acc:HGNC:5465]
ENSG00000189143	19864.1	9718.94	1.0312	7.3036e-15	9.8372e-13	129.056	86.5125	94.7951	53.3604	49.4994	56.4641	CLDN4	claudin 4 [Source:HGNC Symbol;Acc:HGNC:2046]
ENSG00000118513	244.72	647.23	-1.4026	9.3812e-15	1.2468e-12	0.778462	1.3805	1.11877	2.82084	3.28234	2.96655	MYB	MYB proto-oncogene, transcription factor [Source:HGNC Symbol;Acc:HGNC:7545]
ENSG00000197915	461.9	153.27	1.588	1.2595e-14	1.6307e-12	1.55111	1.00846	0.964865	0.387843	0.380631	0.458252	HRNR	hornerin [Source:HGNC Symbol;Acc:HGNC:20846]
ENSG00000054392	615.59	282.92	1.1216	1.3983e-14	1.8026e-12	2.21019	2.26582	2.33146	0.95051	1.17149	1.16129	HHAT	hedgehog acyltransferase [Source:HGNC Symbol;Acc:HGNC:18270]
ENSG00000130962	1864.59	918.58	1.0215	1.8681e-14	2.3979e-12	8.72439	7.4118	6.19214	3.41096	4.10245	4.01579	PRRG1	proline rich and Gla domain 1 [Source:HGNC Symbol;Acc:HGNC:9469]
ENSG00000124102	621.9	257.47	1.2679	1.9353e-14	2.463e-12	25.3896	26.9974	30.5008	13.3281	9.67524	12.9621	PI3	peptidase inhibitor 3 [Source:HGNC Symbol;Acc:HGNC:8947]
ENSG00000151474	1006.69	485.62	1.0519	6.9433e-14	8.3088e-12	1.93738	1.64774	1.45569	0.921598	0.814693	0.809136	FRMD4A	FERM domain containing 4A [Source:HGNC Symbol;Acc:HGNC:25491]
ENSG00000266680	163.25	39.83	2.0468	1.8596e-13	2.0998e-11	2.96088	2.77755	2.80629	0.553408	0.949262	0.687033	-	novel transcript, antisense to PTP4A1
ENSG00000259781	1394.52	2926.4	-1.0688	2.2156e-13	2.4831e-11	61.461	56.7685	40.7361	108.016	137.524	103.601	HMGB1P6	high mobility group box 1 pseudogene 6 [Source:HGNC Symbol;Acc:HGNC:4998]
ENSG00000146859	1110.19	515.94	1.1071	2.9471e-13	3.2424e-11	14.3889	11.3329	9.57915	5.72149	6.15492	5.30606	TMEM140	transmembrane protein 140 [Source:HGNC Symbol;Acc:HGNC:21870]
ENSG00000111319	710.29	349.92	1.0199	3.0275e-13	3.3067e-11	3.09676	2.70299	3.07533	1.45453	1.50007	1.6346	SCNN1A	sodium channel epithelial 1 subunit alpha [Source:HGNC Symbol;Acc:HGNC:10599]
ENSG00000134531	1801.28	751.8	1.2616	3.726e-13	4.0256e-11	7.68104	4.69498	4.51772	2.55664	2.63342	2.20089	EMP1	epithelial membrane protein 1 [Source:HGNC Symbol;Acc:HGNC:3333]
ENSG00000178295	427.54	896.39	-1.0671	4.166e-13	4.4689e-11	0.862576	1.03678	0.762606	1.71161	2.23745	1.8924	GEN1	GEN1 Holliday junction 5' flap endonuclease [Source:HGNC Symbol;Acc:HGNC:26881]
ENSG00000188910	2240.42	1091.29	1.0367	5.4568e-13	5.7509e-11	28.634	19.4294	21.5719	11.4815	10.9644	13.1551	GJB3	gap junction protein beta 3 [Source:HGNC Symbol;Acc:HGNC:4285]
ENSG00000143228	969.62	1956.74	-1.0125	7.3427e-13	7.6313e-11	7.39673	8.28081	5.57752	13.0166	17.1452	14.7179	NUF2	NUF2 component of NDC80 kinetochore complex [Source:HGNC Symbol;Acc:HGNC:14621]
ENSG00000024526	693.68	1398.1	-1.0104	8.8838e-13	8.9843e-11	3.10315	3.19322	2.35632	5.26413	7.05948	5.93729	DEPDC1	DEP domain containing 1 [Source:HGNC Symbol;Acc:HGNC:22949]
ENSG00000141068	629.08	284.4	1.1463	1.3006e-12	1.2808e-10	1.51261	1.09427	1.1863	0.607152	0.611871	0.579734	KSR1	kinase suppressor of ras 1 [Source:HGNC Symbol;Acc:HGNC:6465]
ENSG00000121075	116.41	316.77	-1.4441	1.4297e-12	1.4034e-10	0.554417	0.891878	0.699934	2.10122	2.03147	1.97221	TBX4	T-box transcription factor 4 [Source:HGNC Symbol;Acc:HGNC:11603]
ENSG00000213468	76.13	7.35	3.4103	1.443e-12	1.4118e-10	0.171998	0.121088	0.166049	0.0123702	0.0224242	0.0118173	FIRRE	firre intergenic repeating RNA element [Source:HGNC Symbol;Acc:HGNC:49627]
ENSG00000165029	467.25	183.47	1.3493	1.712e-12	1.6534e-10	1.25528	1.0109	0.765464	0.388898	0.437942	0.419765	ABCA1	ATP binding cassette subfamily A member 1 [Source:HGNC Symbol;Acc:HGNC:29]
ENSG00000142623	775.44	325.16	1.2587	2.4152e-12	2.2884e-10	4.5084	3.20253	3.89397	1.79431	2.00163	1.31017	PADI1	peptidyl arginine deiminase 1 [Source:HGNC Symbol;Acc:HGNC:18367]
ENSG00000105327	3975.19	1028.39	1.9508	2.9438e-12	2.7718e-10	42.1104	26.1338	23.4812	7.84579	8.87305	8.1642	BBC3	BCL2 binding component 3 [Source:HGNC Symbol;Acc:HGNC:17868]
ENSG00000107796	254.03	81.57	1.6289	4.618e-12	4.2417e-10	2.30023	1.92651	2.04311	0.833784	0.48855	0.786174	ACTA2	actin alpha 2, smooth muscle [Source:HGNC Symbol;Acc:HGNC:130]
ENSG00000051341	683.74	1400.36	-1.0342	5.6079e-12	5.1042e-10	1.48516	2.38153	1.62318	3.81214	4.08924	3.84546	POLQ	DNA polymerase theta [Source:HGNC Symbol;Acc:HGNC:9186]
ENSG00000198768	246.73	524.84	-1.0899	6.3759e-12	5.751e-10	1.46045	1.5888	1.26516	2.79812	3.28083	3.53429	APCDD1L	APC down-regulated 1 like [Source:HGNC Symbol;Acc:HGNC:26892]
ENSG00000131711	249.19	82.43	1.5912	1.2818e-11	1.1095e-09	0.555818	0.541639	0.366563	0.143908	0.166668	0.196395	MAP1B	microtubule associated protein 1B [Source:HGNC Symbol;Acc:HGNC:6836]
ENSG00000108244	404.13	174.22	1.2193	1.3492e-11	1.1611e-09	3.86649	3.30143	3.04224	1.56758	1.71748	1.3259	KRT23	keratin 23 [Source:HGNC Symbol;Acc:HGNC:6438]
ENSG00000167767	3055.67	1397.25	1.1287	1.3621e-11	1.1689e-09	23.6036	13.8479	13.9719	8.42552	7.80157	8.43223	KRT80	keratin 80 [Source:HGNC Symbol;Acc:HGNC:27056]
ENSG00000163235	1132.11	539.41	1.0703	1.5393e-11	1.3135e-09	7.16861	5.12102	4.63472	2.5793	3.0555	2.82159	TGFA	transforming growth factor alpha [Source:HGNC Symbol;Acc:HGNC:11765]
ENSG00000203783	387.84	180.1	1.108	1.9475e-11	1.6204e-09	7.59818	8.2211	7.52324	3.4663	4.06512	3.82922	PRR9	proline rich 9 [Source:HGNC Symbol;Acc:HGNC:32057]
ENSG00000006327	5907	2894.31	1.029	2.7244e-11	2.2297e-09	107.698	66.3065	66.8866	41.9451	38.7498	43.0863	TNFRSF12A	TNF receptor superfamily member 12A [Source:HGNC Symbol;Acc:HGNC:18152]
ENSG00000251095	410.02	184.97	1.153	2.8738e-11	2.3332e-09	1.56695	1.50347	1.25547	0.646907	0.773105	0.623879	-	novel transcript
ENSG00000167601	296.45	118.06	1.3273	3.9602e-11	3.1551e-09	1.60973	1.19722	1.43066	0.576073	0.58409	0.611621	AXL	AXL receptor tyrosine kinase [Source:HGNC Symbol;Acc:HGNC:905]
ENSG00000168427	498.58	200.11	1.316	3.999e-11	3.1776e-09	4.32	2.67822	2.68948	1.32614	1.3302	1.42251	KLHL30	kelch like family member 30 [Source:HGNC Symbol;Acc:HGNC:24770]
ENSG00000221968	530.32	249.01	1.0876	4.3853e-11	3.4571e-09	2.42045	1.95313	1.82003	0.983607	0.943257	1.1217	FADS3	fatty acid desaturase 3 [Source:HGNC Symbol;Acc:HGNC:3576]
ENSG00000260193	189.81	67.37	1.4954	7.0086e-11	5.2818e-09	3.45213	3.56216	3.4458	1.29642	1.31696	1.27694	LINC02846	long intergenic non-protein coding RNA 2846 [Source:HGNC Symbol;Acc:HGNC:54381]
ENSG00000100479	459.68	932.56	-1.0209	7.0164e-11	5.2818e-09	3.18424	4.9379	3.34982	8.48191	7.76984	8.04957	POLE2	DNA polymerase epsilon 2, accessory subunit [Source:HGNC Symbol;Acc:HGNC:9178]
ENSG00000124107	1783.88	887.19	1.0064	7.1727e-11	5.386e-09	90.2986	59.4511	69.903	40.1614	32.7296	41.7353	SLPI	secretory leukocyte peptidase inhibitor [Source:HGNC Symbol;Acc:HGNC:11092]
ENSG00000198576	116.99	20.5	2.5056	8.7893e-11	6.4779e-09	1.43884	0.716182	0.715089	0.133988	0.182166	0.21257	ARC	activity regulated cytoskeleton associated protein [Source:HGNC Symbol;Acc:HGNC:648]
ENSG00000070526	814	359.27	1.1816	1.0024e-10	7.2899e-09	7.68917	4.67691	5.22805	2.39127	3.11285	2.65304	ST6GALNAC1	ST6 N-acetylgalactosaminide alpha-2,6-sialyltransferase 1 [Source:HGNC Symbol;Acc:HGNC:23614]
ENSG00000104856	255.11	83.16	1.6144	1.1254e-10	8.0864e-09	2.83922	1.75539	1.62087	0.673139	0.682933	0.768942	RELB	RELB proto-oncogene, NF-kB subunit [Source:HGNC Symbol;Acc:HGNC:9956]
ENSG00000178977	336.48	147.04	1.1904	1.2235e-10	8.7708e-09	4.18465	4.081	3.62131	1.55296	1.80402	2.08979	LINC00324	long intergenic non-protein coding RNA 324 [Source:HGNC Symbol;Acc:HGNC:26628]
ENSG00000171522	330.66	107.6	1.6149	1.2461e-10	8.911e-09	3.1748	1.96753	1.71566	0.601141	0.769218	0.972887	PTGER4	prostaglandin E receptor 4 [Source:HGNC Symbol;Acc:HGNC:9596]
ENSG00000173706	423.88	180.84	1.2289	1.4853e-10	1.0448e-08	1.32158	0.956411	0.849435	0.470391	0.462073	0.465502	HEG1	heart development protein with EGF like domains 1 [Source:HGNC Symbol;Acc:HGNC:29227]
ENSG00000188092	143.56	433.3	-1.5926	1.7987e-10	1.2448e-08	0.768646	0.658768	0.597067	3.11498	1.84157	1.42096	GPR89B	G protein-coupled receptor 89B [Source:HGNC Symbol;Acc:HGNC:13840]
ENSG00000175920	616.41	279.99	1.1387	2.0389e-10	1.4051e-08	4.83545	3.37858	3.01303	1.73883	1.8162	1.78994	DOK7	docking protein 7 [Source:HGNC Symbol;Acc:HGNC:26594]
ENSG00000117472	236.74	87.06	1.4328	2.11e-10	1.4502e-08	2.21618	2.58257	2.545	0.983526	0.728496	1.11709	TSPAN1	tetraspanin 1 [Source:HGNC Symbol;Acc:HGNC:20657]
ENSG00000198753	489.59	211.79	1.2101	2.2021e-10	1.5101e-08	2.05692	1.66225	1.41963	0.597359	0.903472	0.831827	PLXNB3	plexin B3 [Source:HGNC Symbol;Acc:HGNC:9105]
ENSG00000103494	273.37	580.29	-1.0838	2.2853e-10	1.5636e-08	0.450174	0.565181	0.402187	0.961221	1.25329	0.932942	RPGRIP1L	RPGRIP1 like [Source:HGNC Symbol;Acc:HGNC:29168]
ENSG00000164056	632.12	311.59	1.022	2.6517e-10	1.806e-08	4.71095	3.7471	3.27105	2.06812	2.0866	1.90059	SPRY1	sprouty RTK signaling antagonist 1 [Source:HGNC Symbol;Acc:HGNC:11269]
ENSG00000169562	181.85	57.39	1.6558	3.2403e-10	2.1532e-08	0.871832	0.871214	1.12356	0.253118	0.305895	0.392473	GJB1	gap junction protein beta 1 [Source:HGNC Symbol;Acc:HGNC:4283]
ENSG00000123607	321.32	660.51	-1.0383	4.4697e-10	2.8871e-08	0.257673	0.256638	0.185581	0.428458	0.589462	0.488621	TTC21B	tetratricopeptide repeat domain 21B [Source:HGNC Symbol;Acc:HGNC:25660]
ENSG00000168016	3567.47	1760.36	1.0188	4.467e-10	2.8871e-08	9.84301	6.24678	5.52007	3.58176	3.63461	3.96292	TRANK1	tetratricopeptide repeat and ankyrin repeat containing 1 [Source:HGNC Symbol;Acc:HGNC:29011]
ENSG00000150907	567.98	260.51	1.1212	4.4521e-10	2.8871e-08	2.92929	2.04195	2.03323	1.11499	0.996619	1.25751	FOXO1	forkhead box O1 [Source:HGNC Symbol;Acc:HGNC:3819]
ENSG00000151849	719.9	1484.62	-1.0436	5.0459e-10	3.2247e-08	2.32406	4.08078	2.72651	6.11087	7.56731	5.99537	CENPJ	centromere protein J [Source:HGNC Symbol;Acc:HGNC:17272]
ENSG00000163286	288.02	114.18	1.3318	5.4173e-10	3.4328e-08	2.9168	2.65304	2.91815	1.4785	0.923775	1.12005	ALPG	alkaline phosphatase, germ cell [Source:HGNC Symbol;Acc:HGNC:441]
ENSG00000179862	1135.45	549.69	1.0451	5.7622e-10	3.6208e-08	27.0969	16.4614	20.0325	10.2169	10.0582	12.0633	CITED4	Cbp/p300 interacting transactivator with Glu/Asp rich carboxy-terminal domain 4 [Source:HGNC Symbol;Acc:HGNC:18696]
ENSG00000137449	511.8	225.56	1.1801	5.8311e-10	3.6488e-08	2.15827	1.43671	1.50481	0.666561	0.797324	0.896675	CPEB2	cytoplasmic polyadenylation element binding protein 2 [Source:HGNC Symbol;Acc:HGNC:21745]
ENSG00000156876	394.03	803.05	-1.0271	1.5954e-09	9.1974e-08	2.66349	2.93887	1.71448	4.69478	5.57453	5.31683	SASS6	SAS-6 centriolar assembly protein [Source:HGNC Symbol;Acc:HGNC:25403]
ENSG00000103888	737.47	367.5	1.0035	1.8888e-09	1.0744e-07	2.87763	2.4094	1.83502	1.32868	1.12082	1.26301	CEMIP	cell migration inducing hyaluronidase 1 [Source:HGNC Symbol;Acc:HGNC:29213]
ENSG00000188613	395.7	169.46	1.2288	2.2922e-09	1.2942e-07	3.01166	2.30805	1.92535	0.954643	1.32712	0.97073	NANOS1	nanos C2HC-type zinc finger 1 [Source:HGNC Symbol;Acc:HGNC:23044]
ENSG00000118322	346.12	160.78	1.1056	2.3048e-09	1.2988e-07	0.796742	0.671331	0.778449	0.308037	0.391013	0.3974	ATP10B	ATPase phospholipid transporting 10B (putative) [Source:HGNC Symbol;Acc:HGNC:13543]
ENSG00000120889	13297.7	4540.24	1.5504	2.609e-09	1.4566e-07	87.8597	55.2288	51.9337	23.248	24.4437	22.1168	TNFRSF10B	TNF receptor superfamily member 10b [Source:HGNC Symbol;Acc:HGNC:11905]
ENSG00000186871	439.69	905.57	-1.0414	3.0599e-09	1.668e-07	1.79933	3.06175	2.59224	4.60431	6.31741	5.15444	ERCC6L	ERCC excision repair 6 like, spindle assembly checkpoint helicase [Source:HGNC Symbol;Acc:HGNC:20794]
ENSG00000286327	51.37	2.71	4.0874	3.1964e-09	1.733e-07	0.439589	0.363306	0.327582	0.00750196	0	0.0552857	-	novel transcript
ENSG00000011422	1294.33	618.2	1.0657	3.4711e-09	1.8618e-07	9.84649	5.68432	5.79517	3.71153	3.36405	3.6055	PLAUR	plasminogen activator, urokinase receptor [Source:HGNC Symbol;Acc:HGNC:9053]
ENSG00000162981	186.6	56.7	1.7172	3.6152e-09	1.9253e-07	0.702292	0.598946	0.343084	0.140826	0.188295	0.193824	LRATD1	LRAT domain containing 1 [Source:HGNC Symbol;Acc:HGNC:20743]
ENSG00000130513	37892.4	3256.87	3.5403	3.8164e-09	2.0181e-07	806.072	323.384	205.594	37.458	39.7385	43.0822	GDF15	growth differentiation factor 15 [Source:HGNC Symbol;Acc:HGNC:30142]
ENSG00000288597	60.5	0.66	6.5557	3.9812e-09	2.0906e-07	0.0858644	0.116015	0.154129	0.00402119	0	0	-	novel transcript
ENSG00000144452	144.89	42.5	1.7896	4.0919e-09	2.1412e-07	0.419452	0.343841	0.344048	0.0938533	0.163832	0.0832544	ABCA12	ATP binding cassette subfamily A member 12 [Source:HGNC Symbol;Acc:HGNC:14637]
ENSG00000170324	74.16	10.53	2.794	6.0591e-09	3.0739e-07	0.323544	0.164838	0.143946	0.0349041	0.0210909	0.0381075	FRMPD2	FERM and PDZ domain containing 2 [Source:HGNC Symbol;Acc:HGNC:28572]
ENSG00000203697	267.06	98.22	1.4313	7.205e-09	3.6008e-07	1.55399	1.19295	1.04825	0.484423	0.339549	0.638625	CAPN8	calpain 8 [Source:HGNC Symbol;Acc:HGNC:1485]
ENSG00000117245	189.77	67.72	1.4907	8.6015e-09	4.2492e-07	1.29197	0.901299	0.924966	0.459788	0.379473	0.325985	KIF17	kinesin family member 17 [Source:HGNC Symbol;Acc:HGNC:19167]
ENSG00000264175	115.4	22.38	2.3647	1.1483e-08	5.5722e-07	61.3792	35.0239	19.99	10.3003	6.22399	7.02852	MIR3189	microRNA 3189 [Source:HGNC Symbol;Acc:HGNC:38307]
ENSG00000162366	188.71	74.64	1.339	1.226e-08	5.9202e-07	2.88964	3.17855	3.62266	1.19186	1.44037	1.39214	PDZK1IP1	PDZK1 interacting protein 1 [Source:HGNC Symbol;Acc:HGNC:16887]
ENSG00000236264	20.78	126.57	-2.6014	1.5054e-08	7.0984e-07	0.295838	0.635777	0.371631	3.51067	3.80555	0.940795	RPL26P30	ribosomal protein L26 pseudogene 30 [Source:HGNC Symbol;Acc:HGNC:36733]
ENSG00000115423	94.18	219.47	-1.2205	1.8895e-08	8.7312e-07	0.178673	0.152883	0.17997	0.367225	0.441553	0.443451	DNAH6	dynein axonemal heavy chain 6 [Source:HGNC Symbol;Acc:HGNC:2951]
ENSG00000233695	243.69	98.5	1.318	2.4636e-08	1.1212e-06	0.798621	0.954639	0.749753	0.384579	0.42674	0.246199	GAS6-AS1	GAS6 antisense RNA 1 [Source:HGNC Symbol;Acc:HGNC:39826]
ENSG00000204618	464.77	209.89	1.1464	2.678e-08	1.215e-06	7.11876	4.7768	3.8703	2.46247	2.45897	2.53701	RNF39	ring finger protein 39 [Source:HGNC Symbol;Acc:HGNC:18064]
ENSG00000253954	192.55	396.07	-1.0381	3.3029e-08	1.4785e-06	12.5696	17.4728	16.6957	35.7349	36.588	28.3126	HMGN1P38	high mobility group nucleosome binding domain 1 pseudogene 38 [Source:HGNC Symbol;Acc:HGNC:39422]
ENSG00000123560	83.08	16.83	2.3322	4.6845e-08	2.0015e-06	0.298483	0.419964	0.287635	0.0370526	0.119409	0.0573088	PLP1	proteolipid protein 1 [Source:HGNC Symbol;Acc:HGNC:9086]
ENSG00000100206	44.23	134.58	-1.6008	4.8245e-08	2.0496e-06	0.260278	0.360044	0.324942	1.05556	1.16128	0.792796	DMC1	DNA meiotic recombinase 1 [Source:HGNC Symbol;Acc:HGNC:2927]
ENSG00000077274	41.88	3.53	3.6567	6.8303e-08	2.7799e-06	0.310101	0.336348	0.227236	0.0141926	0.0514554	0.0116213	CAPN6	calpain 6 [Source:HGNC Symbol;Acc:HGNC:1483]
ENSG00000269893	1286.24	639.48	1.0071	8.7006e-08	3.4705e-06	6.2194	3.27511	4.77001	2.68164	2.11316	2.65548	SNHG8	small nucleolar RNA host gene 8 [Source:HGNC Symbol;Acc:HGNC:33098]
ENSG00000204869	251.06	122.55	1.0316	9.8172e-08	3.8545e-06	1.66397	1.70553	1.58659	0.807432	0.813157	0.914594	IGFL4	IGF like family member 4 [Source:HGNC Symbol;Acc:HGNC:32931]
ENSG00000117394	52682.1	20649.1	1.3512	1.0164e-07	3.9751e-06	260.015	163.72	161.371	84.3022	72.9957	83.1047	SLC2A1	solute carrier family 2 member 1 [Source:HGNC Symbol;Acc:HGNC:11005]
ENSG00000120832	147.67	314.59	-1.0871	1.1253e-07	4.3556e-06	0.883642	1.11575	0.990515	2.18638	2.69227	1.79028	MTERF2	mitochondrial transcription termination factor 2 [Source:HGNC Symbol;Acc:HGNC:30779]
ENSG00000130766	4949.88	1231.44	2.0069	1.2523e-07	4.7856e-06	52.6974	30.0181	22.4384	8.89766	8.60931	9.90002	SESN2	sestrin 2 [Source:HGNC Symbol;Acc:HGNC:20746]
ENSG00000110195	316.12	155.55	1.0236	1.3478e-07	5.1242e-06	4.29131	4.48441	5.7119	2.66139	2.42169	2.39716	FOLR1	folate receptor alpha [Source:HGNC Symbol;Acc:HGNC:3791]
ENSG00000146285	21.4	84.21	-1.9723	1.6307e-07	6.0995e-06	0.0439315	0.0512753	0.0777977	0.232228	0.270626	0.212794	SCML4	Scm polycomb group protein like 4 [Source:HGNC Symbol;Acc:HGNC:21397]
ENSG00000117643	95.6	208.74	-1.129	1.7045e-07	6.3284e-06	0.223218	0.260865	0.240655	0.563179	0.499527	0.594418	MAN1C1	mannosidase alpha class 1C member 1 [Source:HGNC Symbol;Acc:HGNC:19080]
ENSG00000132003	360.24	175.9	1.0336	1.893e-07	6.9338e-06	2.39261	1.68226	1.54297	0.925344	0.957611	0.992851	ZSWIM4	zinc finger SWIM-type containing 4 [Source:HGNC Symbol;Acc:HGNC:25704]
ENSG00000116717	5222.93	1095.48	2.2533	2.6435e-07	9.3741e-06	105.209	55.8908	38.4843	13.489	15.6092	14.7661	GADD45A	growth arrest and DNA damage inducible alpha [Source:HGNC Symbol;Acc:HGNC:4095]
ENSG00000105855	253.14	120.8	1.0754	2.6637e-07	9.4346e-06	0.390899	0.446446	0.391552	0.181911	0.253816	0.178746	ITGB8	integrin subunit beta 8 [Source:HGNC Symbol;Acc:HGNC:6163]
ENSG00000148344	124.88	46.21	1.429	3.0908e-07	1.0797e-05	1.68496	1.7208	1.45335	0.569939	0.608685	0.705454	PTGES	prostaglandin E synthase [Source:HGNC Symbol;Acc:HGNC:9599]
ENSG00000129437	119.88	36.08	1.7159	4.053e-07	1.3709e-05	2.78212	2.97321	1.67591	0.842489	0.509077	0.983048	KLK14	kallikrein related peptidase 14 [Source:HGNC Symbol;Acc:HGNC:6362]
ENSG00000081041	188.87	66.36	1.5138	4.2416e-07	1.4283e-05	4.86102	2.9742	2.10505	1.255	1.34334	1.05699	CXCL2	C-X-C motif chemokine ligand 2 [Source:HGNC Symbol;Acc:HGNC:4603]
ENSG00000227392	43.92	121.1	-1.4629	4.3715e-07	1.4671e-05	0.194844	0.284099	0.205806	0.620371	0.69846	0.655599	HPN-AS1	HPN antisense RNA 1 [Source:HGNC Symbol;Acc:HGNC:47041]
ENSG00000079337	190.02	82.63	1.199	4.39e-07	1.4716e-05	0.43592	0.315728	0.399795	0.16356	0.172643	0.189873	RAPGEF3	Rap guanine nucleotide exchange factor 3 [Source:HGNC Symbol;Acc:HGNC:16629]
ENSG00000091879	98.69	25.07	1.9905	5.0158e-07	1.6628e-05	0.534933	0.311702	0.221948	0.0811612	0.124834	0.0785406	ANGPT2	angiopoietin 2 [Source:HGNC Symbol;Acc:HGNC:485]
ENSG00000148677	2797.41	293.09	3.2549	5.9862e-07	1.9585e-05	73.4543	25.8978	15.5438	4.24269	4.61966	3.74922	ANKRD1	ankyrin repeat domain 1 [Source:HGNC Symbol;Acc:HGNC:15819]
ENSG00000124635	284.25	126.37	1.1695	7.4256e-07	2.4008e-05	8.71006	6.8638	4.44105	2.85145	3.2433	3.2178	H2BC11	H2B clustered histone 11 [Source:HGNC Symbol;Acc:HGNC:4761]
ENSG00000182393	137.67	52.53	1.3946	8.8678e-07	2.8126e-05	4.78582	3.63226	4.61318	2.10215	1.68061	1.43001	IFNL1	interferon lambda 1 [Source:HGNC Symbol;Acc:HGNC:18363]
ENSG00000142871	2207.61	485.43	2.1852	1.1028e-06	3.3972e-05	23.9032	11.6139	8.3789	3.32109	3.45658	3.33545	CCN1	cellular communication network factor 1 [Source:HGNC Symbol;Acc:HGNC:2654]
ENSG00000164379	6976.88	2716.53	1.3608	1.2763e-06	3.8841e-05	88.42	56.2711	48.0574	27.1174	25.0084	26.4928	FOXQ1	forkhead box Q1 [Source:HGNC Symbol;Acc:HGNC:20951]
ENSG00000246763	72.87	207.42	-1.5073	1.3225e-06	3.9963e-05	1.17179	0.733809	0.371316	2.27468	2.62052	1.87999	RGMB-AS1	RGMB antisense RNA 1 [Source:HGNC Symbol;Acc:HGNC:48666]
ENSG00000187720	221	85.09	1.3784	1.3679e-06	4.1251e-05	0.507693	0.242977	0.273358	0.161428	0.130058	0.121815	THSD4	thrombospondin type 1 domain containing 4 [Source:HGNC Symbol;Acc:HGNC:25835]
ENSG00000136689	233.97	115.91	1.015	1.3701e-06	4.1276e-05	1.55915	1.80883	1.93609	1.02855	0.887861	0.835875	IL1RN	interleukin 1 receptor antagonist [Source:HGNC Symbol;Acc:HGNC:6000]
ENSG00000124145	19357.3	6784.69	1.5125	1.3967e-06	4.1952e-05	258.263	140.751	144.931	69.811	66.0748	64.0518	SDC4	syndecan 4 [Source:HGNC Symbol;Acc:HGNC:10661]
ENSG00000205426	20.41	75.98	-1.8918	1.6276e-06	4.8069e-05	0.167758	0.307927	0.302596	0.974496	1.20909	0.851147	KRT81	keratin 81 [Source:HGNC Symbol;Acc:HGNC:6458]
ENSG00000276600	90.72	25.68	1.8044	1.7365e-06	5.0836e-05	0.722604	0.427392	0.653227	0.203994	0.115046	0.217148	RAB7B	RAB7B, member RAS oncogene family [Source:HGNC Symbol;Acc:HGNC:30513]
ENSG00000162772	5376.43	425.45	3.6596	1.8298e-06	5.3102e-05	68.5165	18.2186	11.0348	2.94689	2.60915	2.55017	ATF3	activating transcription factor 3 [Source:HGNC Symbol;Acc:HGNC:785]
ENSG00000144045	81.37	22.53	1.84	1.9335e-06	5.5894e-05	0.76792	0.78775	0.522673	0.260631	0.12599	0.213414	DQX1	DEAQ-box RNA dependent ATPase 1 [Source:HGNC Symbol;Acc:HGNC:20410]
ENSG00000228705	404.06	166.37	1.2808	2.1962e-06	6.2526e-05	10.5328	4.66627	4.29855	2.60192	3.00513	2.81824	LINC00659	long intergenic non-protein coding RNA 659 [Source:HGNC Symbol;Acc:HGNC:44316]
ENSG00000180532	152.05	57.78	1.3931	2.2487e-06	6.39e-05	1.92186	1.13937	1.04617	0.50681	0.534531	0.59608	ZSCAN4	zinc finger and SCAN domain containing 4 [Source:HGNC Symbol;Acc:HGNC:23709]
ENSG00000137878	74.2	19.02	1.9574	2.271e-06	6.4412e-05	0.234381	0.172973	0.122763	0.0608233	0.0352826	0.0458198	GCOM1	GRINL1A complex locus 1 [Source:HGNC Symbol;Acc:HGNC:26424]
ENSG00000272933	492.99	236.07	1.0607	2.7113e-06	7.5127e-05	12.0681	5.62843	9.0686	4.38481	4.15394	4.94445	-	novel transcript
ENSG00000181634	4784.01	687.16	2.7996	2.8106e-06	7.7592e-05	27.0574	11.0402	7.0886	1.93816	2.58351	2.28564	TNFSF15	TNF superfamily member 15 [Source:HGNC Symbol;Acc:HGNC:11931]
ENSG00000125285	57.22	6.77	3.058	3.0247e-06	8.2959e-05	0.910916	0.415119	0.116449	0.0428592	0.0517956	0.0842268	SOX21	SRY-box transcription factor 21 [Source:HGNC Symbol;Acc:HGNC:11197]
ENSG00000160183	133.98	52.54	1.3439	3.0271e-06	8.2959e-05	0.841929	0.563029	0.599605	0.250232	0.253035	0.321983	TMPRSS3	transmembrane serine protease 3 [Source:HGNC Symbol;Acc:HGNC:11877]
ENSG00000120875	15410.5	6546.14	1.2352	3.0538e-06	8.3537e-05	70.3621	46.6304	38.8075	22.8068	22.8061	23.7289	DUSP4	dual specificity phosphatase 4 [Source:HGNC Symbol;Acc:HGNC:3070]
ENSG00000148175	81.32	23.03	1.8186	3.2178e-06	8.7229e-05	0.840391	0.573186	0.456164	0.235049	0.151498	0.166804	STOM	stomatin [Source:HGNC Symbol;Acc:HGNC:3383]
ENSG00000165509	17.36	0	6.5999	3.2874e-06	8.8956e-05	0.135139	0.177592	0.149642	0	0	0	MAGEC3	MAGE family member C3 [Source:HGNC Symbol;Acc:HGNC:23798]
ENSG00000277639	118.17	44.92	1.3926	3.4283e-06	9.2268e-05	1.38083	1.84934	1.16516	0.644612	0.519346	0.579578	-	novel protein
ENSG00000235689	84.46	26.23	1.6811	3.5081e-06	9.3911e-05	8.1111	9.57581	5.64761	2.15908	2.49581	2.92092	-	glutathione S-transferase (GST) theta pseudogene
ENSG00000172345	173.62	78.64	1.143	3.5452e-06	9.4737e-05	0.730405	0.761856	0.525635	0.355855	0.301037	0.297861	STARD5	StAR related lipid transfer domain containing 5 [Source:HGNC Symbol;Acc:HGNC:18065]
ENSG00000129451	176.48	81.19	1.1146	3.8859e-06	0.00010283	1.029	1.12197	1.26152	0.620332	0.446615	0.578197	KLK10	kallikrein related peptidase 10 [Source:HGNC Symbol;Acc:HGNC:6358]
ENSG00000156804	217.85	92.64	1.2298	3.9386e-06	0.00010414	0.972818	0.719417	0.476886	0.359268	0.266241	0.338585	FBXO32	F-box protein 32 [Source:HGNC Symbol;Acc:HGNC:16731]
ENSG00000260708	89.79	185.36	-1.0449	4.3465e-06	0.00011402	2.74934	3.46912	3.63003	7.25735	7.18824	6.86151	-	novel transcript, antisense to TBC1D22A
ENSG00000125740	147.27	49.88	1.5589	4.4554e-06	0.00011667	1.0131	0.479028	0.455502	0.279843	0.185461	0.225449	FOSB	FosB proto-oncogene, AP-1 transcription factor subunit [Source:HGNC Symbol;Acc:HGNC:3797]
ENSG00000227234	26.89	1.31	4.3873	4.5255e-06	0.0001183	0.96152	1.77344	1.51355	0	0.13	0.0880827	SPANXB1	SPANX family member B1 [Source:HGNC Symbol;Acc:HGNC:14329]
ENSG00000165171	159.89	75.35	1.0824	4.5312e-06	0.00011835	2.79828	2.76068	2.54953	1.34827	1.25338	1.40124	METTL27	methyltransferase like 27 [Source:HGNC Symbol;Acc:HGNC:19068]
ENSG00000012779	56.46	13.62	2.0316	5.0758e-06	0.00013132	0.420439	0.353113	0.339062	0.0873546	0.073086	0.121049	ALOX5	arachidonate 5-lipoxygenase [Source:HGNC Symbol;Acc:HGNC:435]
ENSG00000129946	216.74	98.82	1.1253	5.2967e-06	0.00013644	1.50122	1.26584	1.06354	0.728676	0.422111	0.675562	SHC2	SHC adaptor protein 2 [Source:HGNC Symbol;Acc:HGNC:29869]
ENSG00000180644	124.74	50.47	1.3126	5.3537e-06	0.00013779	1.34448	0.994873	1.2943	0.557421	0.553353	0.431983	PRF1	perforin 1 [Source:HGNC Symbol;Acc:HGNC:9360]
ENSG00000286966	60.59	15.85	1.939	5.8387e-06	0.00014774	1.60128	2.05397	1.56452	0.615608	0.425124	0.384061	-	novel transcript
ENSG00000271013	88.88	189.64	-1.0949	6.2655e-06	0.00015696	0.453773	0.480388	0.285014	0.932442	0.845147	0.939123	LRRC37A9P	leucine rich repeat containing 37 member A9, pseudogene [Source:HGNC Symbol;Acc:HGNC:43813]
ENSG00000111181	56.78	12.38	2.1638	6.3797e-06	0.00015968	0.196632	0.267145	0.320196	0.0565673	0.034181	0.0887785	SLC6A12	solute carrier family 6 member 12 [Source:HGNC Symbol;Acc:HGNC:11045]
ENSG00000196406	16.34	0	6.5128	6.8884e-06	0.00017142	0.328496	0.795219	0.641908	0	0	0	SPANXD	SPANX family member D [Source:HGNC Symbol;Acc:HGNC:14332]
ENSG00000167525	59.21	135.73	-1.1933	7.0285e-06	0.00017461	0.2736	0.319336	0.262545	0.698547	0.760968	0.592134	PROCA1	protein interacting with cyclin A1 [Source:HGNC Symbol;Acc:HGNC:28600]
ENSG00000042832	54.81	13.29	2.0371	7.1248e-06	0.00017644	0.140877	0.132237	0.0895767	0.0315214	0.0272099	0.0331853	TG	thyroglobulin [Source:HGNC Symbol;Acc:HGNC:11764]
ENSG00000149548	124.71	258.67	-1.053	7.5126e-06	0.00018496	0.645156	0.856751	0.408462	1.39793	1.36283	1.3702	CCDC15	coiled-coil domain containing 15 [Source:HGNC Symbol;Acc:HGNC:25798]
ENSG00000142611	52.74	123.07	-1.2225	8.1794e-06	0.00019925	0.114689	0.148074	0.134467	0.338738	0.316329	0.315193	PRDM16	PR/SET domain 16 [Source:HGNC Symbol;Acc:HGNC:14000]
ENSG00000175592	2208.21	778.12	1.5047	1.0749e-05	0.00025323	42.8202	21.7335	21.3825	10.3205	10.4338	11.0175	FOSL1	FOS like 1, AP-1 transcription factor subunit [Source:HGNC Symbol;Acc:HGNC:13718]
ENSG00000189366	164.13	74.54	1.1409	1.2832e-05	0.0002958	2.73916	2.04412	2.95798	0.983853	1.42289	1.29426	ALG1L	ALG1 chitobiosyldiphosphodolichol beta-mannosyltransferase like [Source:HGNC Symbol;Acc:HGNC:33721]
ENSG00000184584	156.76	74.84	1.0669	1.3097e-05	0.00030099	0.881983	0.721267	0.795836	0.349998	0.429288	0.423469	STING1	stimulator of interferon response cGAMP interactor 1 [Source:HGNC Symbol;Acc:HGNC:27962]
ENSG00000176912	75.61	22	1.7583	1.3601e-05	0.00031138	0.732705	0.900198	0.527492	0.232973	0.129044	0.294098	TYMSOS	TYMS opposite strand [Source:HGNC Symbol;Acc:HGNC:29553]
ENSG00000004777	93.89	197.68	-1.0735	1.5722e-05	0.0003524	0.544232	0.407515	0.360656	0.733814	1.11716	1.04957	ARHGAP33	Rho GTPase activating protein 33 [Source:HGNC Symbol;Acc:HGNC:23085]
ENSG00000166046	176.93	65.26	1.4409	1.6223e-05	0.00036149	1.07607	0.511361	0.37864	0.268976	0.260964	0.229553	TCP11L2	t-complex 11 like 2 [Source:HGNC Symbol;Acc:HGNC:28627]
ENSG00000273174	38.11	6.59	2.5161	1.7681e-05	0.00039059	1.9826	1.64553	1.33444	0.443611	0.160832	0.290595	-	novel transcript, antisense to RAB43
ENSG00000148357	62.17	17.32	1.865	1.7692e-05	0.00039059	0.0654369	0.0616035	0.0947178	0.0195222	0.0294909	0.0159854	HMCN2	hemicentin 2 [Source:HGNC Symbol;Acc:HGNC:21293]
ENSG00000170925	24.16	0.53	5.2811	1.7872e-05	0.00039414	0.55849	0.475954	0.389762	0	0	0.0328899	TEX13B	testis expressed 13B [Source:HGNC Symbol;Acc:HGNC:11736]
ENSG00000119138	447.82	205.93	1.1221	1.8584e-05	0.00040774	3.33594	1.75779	1.23921	1.01201	1.09489	0.9431	KLF9	Kruppel like factor 9 [Source:HGNC Symbol;Acc:HGNC:1123]
ENSG00000007952	99.87	33.56	1.5804	1.939e-05	0.00042356	1.32148	0.558558	0.994653	0.325251	0.393068	0.298608	NOX1	NADPH oxidase 1 [Source:HGNC Symbol;Acc:HGNC:7889]
ENSG00000142627	13496	3805.33	1.8264	2.0054e-05	0.00043428	126.555	59.4159	53.4349	23.5933	22.5	24.6963	EPHA2	EPH receptor A2 [Source:HGNC Symbol;Acc:HGNC:3386]
ENSG00000166963	50.08	119.35	-1.253	2.1848e-05	0.00046939	0.107558	0.155255	0.0845278	0.277809	0.298747	0.287241	MAP1A	microtubule associated protein 1A [Source:HGNC Symbol;Acc:HGNC:6835]
ENSG00000132911	146.96	70.4	1.0615	2.1933e-05	0.0004709	1.77271	1.4957	1.36683	0.784932	0.766673	0.774795	NMUR2	neuromedin U receptor 2 [Source:HGNC Symbol;Acc:HGNC:16454]
ENSG00000065534	38.76	100.69	-1.3734	2.2656e-05	0.00048435	0.0393036	0.0419418	0.0471787	0.088194	0.147577	0.114805	MYLK	myosin light chain kinase [Source:HGNC Symbol;Acc:HGNC:7590]
ENSG00000163739	532.55	88.26	2.5948	2.2786e-05	0.00048676	17.3262	6.99683	4.42852	1.38018	2.2017	1.41644	CXCL1	C-X-C motif chemokine ligand 1 [Source:HGNC Symbol;Acc:HGNC:4602]
ENSG00000130635	33.65	5.13	2.6711	2.6585e-05	0.00056074	0.0624548	0.0671097	0.0915313	0.00898353	0.0081425	0.01839	COL5A1	collagen type V alpha 1 chain [Source:HGNC Symbol;Acc:HGNC:2209]
ENSG00000244257	3.39	31.16	-3.1939	2.8771e-05	0.00059804	0.014632	0	0.0214441	0.0773468	0.164693	0.111589	PKD1P1	polycystin 1, transient receptor potential channel interacting pseudogene 1 [Source:HGNC Symbol;Acc:HGNC:30065]
ENSG00000253930	282.3	133.42	1.0928	3.1753e-05	0.00064924	12.5831	10.014	9.96519	4.6036	8.13125	3.41518	TNFRSF10A-AS1	TNFRSF10A antisense RNA 1 [Source:HGNC Symbol;Acc:HGNC:53164]
ENSG00000204252	28.23	3.69	2.9034	3.2527e-05	0.00066147	0.156087	0.181369	0.183004	0.0251458	0.0151944	0.0308853	HLA-DOA	major histocompatibility complex, class II, DO alpha [Source:HGNC Symbol;Acc:HGNC:4936]
ENSG00000168939	140.91	61.98	1.1765	3.5056e-05	0.00070668	0.403054	0.337463	0.241807	0.156635	0.120461	0.174898	SPRY3	sprouty RTK signaling antagonist 3 [Source:HGNC Symbol;Acc:HGNC:11271]
ENSG00000144395	113.45	234.41	-1.0449	3.6217e-05	0.00072666	0.257209	0.397606	0.211095	0.489471	0.779317	0.600133	CCDC150	coiled-coil domain containing 150 [Source:HGNC Symbol;Acc:HGNC:26834]
ENSG00000125845	149.99	69.42	1.1096	4.2405e-05	0.00083138	1.36225	0.888782	0.857587	0.494918	0.487034	0.526832	BMP2	bone morphogenetic protein 2 [Source:HGNC Symbol;Acc:HGNC:1069]
ENSG00000177494	36.7	7.09	2.3791	4.351e-05	0.00084917	0.427246	0.326612	0.461377	0.0452828	0.109449	0.0926977	ZBED2	zinc finger BED-type containing 2 [Source:HGNC Symbol;Acc:HGNC:20710]
ENSG00000109846	89.76	31.17	1.5385	4.4081e-05	0.00085807	0.43114	0.494384	0.576436	0.26275	0.179476	0.102897	CRYAB	crystallin alpha B [Source:HGNC Symbol;Acc:HGNC:2389]
ENSG00000241007	40.82	100.11	-1.2886	4.6327e-05	0.00089773	0.958249	0.858597	0.808578	1.99548	2.83555	1.92125	SEPTIN7P6	septin 7 pseudogene 6 [Source:HGNC Symbol;Acc:HGNC:38042]
ENSG00000261326	34.41	91.61	-1.4118	5.0234e-05	0.00096534	0.0926127	0.200523	0.118026	0.38111	0.401777	0.358543	LINC01355	long intergenic non-protein coding RNA 1355 [Source:HGNC Symbol;Acc:HGNC:50584]
ENSG00000163734	755.32	129.83	2.541	5.5235e-05	0.0010474	15.9968	4.67865	4.30744	1.53615	1.63804	1.33184	CXCL3	C-X-C motif chemokine ligand 3 [Source:HGNC Symbol;Acc:HGNC:4604]
ENSG00000205325	174.39	85.82	1.0312	5.8462e-05	0.001103	1.14266	1.15548	1.42027	0.75731	0.695211	0.465083	-	novel transcript
ENSG00000276085	30.23	2.83	3.4046	6.2007e-05	0.0011604	1.03366	0.140644	0.331126	0.0511859	0.0412391	0.0558837	CCL3L1	C-C motif chemokine ligand 3 like 1 [Source:HGNC Symbol;Acc:HGNC:10628]
ENSG00000106366	251.7	22.46	3.4814	6.41e-05	0.0011958	4.21977	0.949233	0.685863	0.214426	0.105574	0.227603	SERPINE1	serpin family E member 1 [Source:HGNC Symbol;Acc:HGNC:8583]
ENSG00000253632	54.34	14.69	1.9092	7.3128e-05	0.0013428	2.44274	1.28726	2.46242	0.468487	0.849255	0.447548	-	novel transcript
ENSG00000150551	90.7	33.99	1.4321	7.5755e-05	0.001384	0.594321	0.402411	0.672362	0.214169	0.289275	0.154737	LYPD1	LY6/PLAUR domain containing 1 [Source:HGNC Symbol;Acc:HGNC:28431]
ENSG00000100433	3.41	25.5	-2.906	8.5802e-05	0.0015377	0.0120284	0.0124792	0.0058761	0.072667	0.0805003	0.0842947	KCNK10	potassium two pore domain channel subfamily K member 10 [Source:HGNC Symbol;Acc:HGNC:6273]
ENSG00000131746	38281.8	17226	1.1521	8.8475e-05	0.0015743	269.651	157.355	150.104	90.1802	88.6263	93.5193	TNS4	tensin 4 [Source:HGNC Symbol;Acc:HGNC:24352]
ENSG00000263325	75.48	27.95	1.4298	9.0449e-05	0.0016028	8.82986	5.65241	6.42446	2.74286	2.51465	2.86551	-	novel transcript, antisense to PRSS22
ENSG00000155792	170.84	75.77	1.1747	9.1349e-05	0.0016154	2.36893	1.42548	0.990622	0.753734	0.77253	0.695307	DEPTOR	DEP domain containing MTOR interacting protein [Source:HGNC Symbol;Acc:HGNC:22953]
ENSG00000119636	40.16	98.11	-1.2841	9.9968e-05	0.0017427	0.177651	0.251331	0.210391	0.417373	0.714018	0.50598	BBOF1	basal body orientation factor 1 [Source:HGNC Symbol;Acc:HGNC:19855]
ENSG00000225255	45.2	10.73	2.0811	0.00010043	0.0017487	0.873428	1.29884	1.70675	0.498349	0.247989	0.216034	PSLNR	prostate enriched lncRNA [Source:HGNC Symbol;Acc:HGNC:54405]
ENSG00000283696	102.78	45.25	1.1934	0.00010627	0.0018334	2.8463	2.69395	2.04913	1.18155	1.36716	0.946911	-	novel transcript
ENSG00000136928	36.11	7.48	2.2816	0.00011032	0.0018945	0.14238	0.151233	0.0695553	0.02048	0.0330002	0.0251545	GABBR2	gamma-aminobutyric acid type B receptor subunit 2 [Source:HGNC Symbol;Acc:HGNC:4507]
ENSG00000100583	48.35	114.75	-1.2415	0.00011181	0.0019158	0.333044	0.612077	0.418369	1.1114	1.41261	0.855136	SAMD15	sterile alpha motif domain containing 15 [Source:HGNC Symbol;Acc:HGNC:18631]
ENSG00000104783	50.4	14.07	1.8288	0.00011271	0.0019301	0.26326	0.500733	0.328664	0.0883574	0.0978822	0.132642	KCNN4	potassium calcium-activated channel subfamily N member 4 [Source:HGNC Symbol;Acc:HGNC:6293]
ENSG00000166532	1052.8	300.68	1.8083	0.0001168	0.0019889	5.01792	2.1569	1.8219	0.877548	1.00063	0.816443	RIMKLB	ribosomal modification protein rimK like family member B [Source:HGNC Symbol;Acc:HGNC:29228]
ENSG00000091482	130.99	60.48	1.1301	0.00012094	0.0020476	2.65096	2.47724	2.14923	1.02225	1.64719	0.852553	SMPX	small muscle protein X-linked [Source:HGNC Symbol;Acc:HGNC:11122]
ENSG00000203650	21.74	1.19	4.1201	0.00012138	0.0020517	0.159768	0.0282999	0.0609171	0.00784723	0	0.00642557	LINC01285	long intergenic non-protein coding RNA 1285 [Source:HGNC Symbol;Acc:HGNC:50344]
ENSG00000273018	57.47	118.2	-1.0384	0.00012204	0.0020604	0.143776	0.131467	0.138094	0.277263	0.323213	0.291324	FAM106A	family with sequence similarity 106 member A [Source:HGNC Symbol;Acc:HGNC:25682]
ENSG00000116299	125.14	58.25	1.1162	0.00013257	0.0022122	0.335729	0.320223	0.343893	0.125402	0.227324	0.136167	ELAPOR1	endosome-lysosome associated apoptosis and autophagy regulator 1 [Source:HGNC Symbol;Acc:HGNC:29618]
ENSG00000013588	19143	5655.4	1.7591	0.00013625	0.0022673	99.7916	42.3834	41.2378	19.1734	17.9614	19.7118	GPRC5A	G protein-coupled receptor class C group 5 member A [Source:HGNC Symbol;Acc:HGNC:9836]
ENSG00000169429	143.58	12.37	3.5308	0.00014164	0.0023388	3.49098	0.807413	0.412776	0.134332	0.108227	0.183325	CXCL8	C-X-C motif chemokine ligand 8 [Source:HGNC Symbol;Acc:HGNC:6025]
ENSG00000118523	865.47	205.21	2.0762	0.00014535	0.0023935	16.2154	6.25207	4.73316	2.07974	2.25427	2.43154	CCN2	cellular communication network factor 2 [Source:HGNC Symbol;Acc:HGNC:2500]
ENSG00000141682	920.64	202.49	2.1848	0.00014583	0.0023988	17.8212	9.04962	4.14995	2.45366	2.31402	2.3659	PMAIP1	phorbol-12-myristate-13-acetate-induced protein 1 [Source:HGNC Symbol;Acc:HGNC:9108]
ENSG00000243279	124.97	55.83	1.1595	0.00015098	0.0024713	1.69246	1.33635	2.47309	0.889759	0.783679	0.913792	PRAF2	PRA1 domain family member 2 [Source:HGNC Symbol;Acc:HGNC:28911]
ENSG00000153292	62.57	20.39	1.6385	0.00015218	0.0024872	0.160818	0.102193	0.108024	0.030361	0.0635987	0.0331475	ADGRF1	adhesion G protein-coupled receptor F1 [Source:HGNC Symbol;Acc:HGNC:18990]
ENSG00000273084	103.44	47.62	1.1124	0.00015605	0.0025391	2.40471	3.01574	2.65932	1.33036	1.12543	1.43794	-	novel transcript
ENSG00000157502	32	6.7	2.2539	0.00015752	0.0025588	0.160487	0.225967	0.156802	0.0346268	0.0418468	0.0425304	PWWP3B	PWWP domain containing 3B [Source:HGNC Symbol;Acc:HGNC:26583]
ENSG00000246640	88.79	33.55	1.4176	0.00016174	0.0026174	1.21859	0.73409	0.624112	0.366115	0.418537	0.234968	PICART1	p53 inducible cancer associated RNA transcript 1 [Source:HGNC Symbol;Acc:HGNC:27576]
ENSG00000286058	68.81	144.03	-1.0647	0.000164	0.0026526	0.460527	0.515508	0.260499	0.994508	0.899559	0.804345	-	novel transcript
ENSG00000162510	79.89	31.1	1.3615	0.00016457	0.002659	0.302778	0.437533	0.533544	0.190539	0.164477	0.164935	MATN1	matrilin 1 [Source:HGNC Symbol;Acc:HGNC:6907]
ENSG00000254531	110.2	50.77	1.1074	0.00016456	0.002659	3.65513	3.30176	3.29413	1.39597	1.45699	2.10429	FLJ20021	uncharacterized LOC90024 [Source:NCBI gene (formerly Entrezgene);Acc:90024]
ENSG00000254166	3556.29	1456.86	1.2876	0.00016794	0.0027091	5.67897	3.49162	2.60299	1.5364	1.82948	1.68849	CASC19	cancer susceptibility 19 [Source:HGNC Symbol;Acc:HGNC:49476]
ENSG00000169330	26.57	70.11	-1.4004	0.00017548	0.0028156	0.0783013	0.125547	0.0765035	0.232937	0.272845	0.267031	MINAR1	membrane integral NOTCH2 associated receptor 1 [Source:HGNC Symbol;Acc:HGNC:29172]
ENSG00000137821	32.35	84.74	-1.3855	0.00018899	0.002983	0.0822116	0.0982162	0.0584175	0.28345	0.218263	0.14994	LRRC49	leucine rich repeat containing 49 [Source:HGNC Symbol;Acc:HGNC:25965]
ENSG00000115641	4233.3	1731.27	1.2899	0.00019066	0.0030046	22.5447	12.1216	12.2487	7.64102	5.76453	6.69964	FHL2	four and a half LIM domains 2 [Source:HGNC Symbol;Acc:HGNC:3703]
ENSG00000171124	22.81	0.53	5.2303	0.00020494	0.003206	0.424353	0.099681	0.0156457	0	0	0.0132025	FUT3	fucosyltransferase 3 (Lewis blood group) [Source:HGNC Symbol;Acc:HGNC:4014]
ENSG00000147206	21.06	2.09	3.4082	0.00021296	0.0033039	0.12643	0.116594	0.192154	0	0.0341875	0.011582	NXF3	nuclear RNA export factor 3 [Source:HGNC Symbol;Acc:HGNC:8073]
ENSG00000284946	62.6	134.12	-1.1015	0.00021547	0.003336	0.128851	0.263749	0.251786	0.508434	0.419519	0.516814	-	novel protein
ENSG00000243978	26.22	2.64	3.3229	0.00022511	0.0034657	0.103551	0.144799	0.101173	0.0362656	0	0	RTL9	retrotransposon Gag like 9 [Source:HGNC Symbol;Acc:HGNC:29245]
ENSG00000242082	105.16	48.77	1.1181	0.00022776	0.0035011	0.409636	0.409811	0.318041	0.150988	0.235876	0.165851	SLC5A4-AS1	SLC5A4 antisense RNA 1 [Source:HGNC Symbol;Acc:HGNC:53163]
ENSG00000126878	98	29.76	1.7099	0.00023487	0.0035901	0.850269	0.311916	0.19736	0.160819	0.0971752	0.174287	AIF1L	allograft inflammatory factor 1 like [Source:HGNC Symbol;Acc:HGNC:28904]
ENSG00000162894	54.42	17.47	1.6448	0.0002543	0.0038519	0.553656	0.317436	0.298943	0.117362	0.150697	0.126131	FCMR	Fc fragment of IgM receptor [Source:HGNC Symbol;Acc:HGNC:14315]
ENSG00000186480	3027.57	6144.23	-1.0211	0.00025679	0.0038836	13.7762	20.2006	26.8732	42.7874	42.9538	43.9423	INSIG1	insulin induced gene 1 [Source:HGNC Symbol;Acc:HGNC:6083]
ENSG00000130052	28.64	77.26	-1.4365	0.00027654	0.0041427	0.120925	0.19051	0.0700142	0.302139	0.326989	0.443108	STARD8	StAR related lipid transfer domain containing 8 [Source:HGNC Symbol;Acc:HGNC:19161]
ENSG00000269097	89.16	37.85	1.2277	0.00027752	0.0041554	2.7513	3.22821	2.65613	0.857454	1.31523	1.67427	TPRG1LP1	tumor protein p63 regulated 1 like pseudogene 1 [Source:HGNC Symbol;Acc:HGNC:52353]
ENSG00000115461	29.94	6.13	2.2594	0.00029763	0.0043994	0.130893	0.111834	0.0977962	0.027134	0.0140536	0.0317403	IGFBP5	insulin like growth factor binding protein 5 [Source:HGNC Symbol;Acc:HGNC:5474]
ENSG00000280385	58.16	127.16	-1.1267	0.00030511	0.0044945	0.204355	0.360998	0.383138	0.528308	0.89385	0.755905	-	novel transcript
ENSG00000142405	32.95	7.42	2.1576	0.00030703	0.0045139	0.155894	0.119998	0.211275	0.0253172	0.0489537	0.0414612	NLRP12	NLR family pyrin domain containing 12 [Source:HGNC Symbol;Acc:HGNC:22938]
ENSG00000105929	64.31	23.69	1.4284	0.00031199	0.0045779	0.476848	0.369475	0.300771	0.145863	0.117517	0.179156	ATP6V0A4	ATPase H+ transporting V0 subunit a4 [Source:HGNC Symbol;Acc:HGNC:866]
ENSG00000225383	59.22	20.54	1.5206	0.0003176	0.0046444	0.5789	0.454506	0.336308	0.204797	0.12375	0.167695	SFTA1P	surfactant associated 1, lncRNA [Source:HGNC Symbol;Acc:HGNC:18383]
ENSG00000275620	32.68	7.76	2.0792	0.00032311	0.0047066	0.107549	0.121724	0.0859743	0.0328149	0.0237943	0.021496	FLJ16779	uncharacterized LOC100192386 [Source:NCBI gene (formerly Entrezgene);Acc:100192386]
ENSG00000139318	1187.98	224.98	2.4006	0.0003583	0.0051198	14.8556	4.59763	3.16383	1.64322	1.36576	1.47848	DUSP6	dual specificity phosphatase 6 [Source:HGNC Symbol;Acc:HGNC:3072]
ENSG00000265972	6773.23	1020.31	2.7308	0.00036176	0.0051595	94.1695	26.7214	17.1814	7.1701	6.76568	7.87561	TXNIP	thioredoxin interacting protein [Source:HGNC Symbol;Acc:HGNC:16952]
ENSG00000173320	41.14	93.14	-1.176	0.00037178	0.0052724	0.0810409	0.0840783	0.10058	0.152171	0.263856	0.2167	STOX2	storkhead box 2 [Source:HGNC Symbol;Acc:HGNC:25450]
ENSG00000237265	9.55	0	5.7379	0.00039604	0.0055586	0.124775	0.181233	0.0487642	0	0	0	-	chromosome X open reading frame 49 (CXorf49) pseudogene
ENSG00000259668	3.42	24.91	-2.865	0.00041376	0.0057616	0.0227608	0.055099	0	0.236814	0.203103	0.143869	-	novel transcript, antisense to DMXL2
ENSG00000126895	16.68	1.19	3.7359	0.00043134	0.0059621	0.121589	0.229358	0.194397	0.0222594	0	0.0182267	AVPR2	arginine vasopressin receptor 2 [Source:HGNC Symbol;Acc:HGNC:897]
ENSG00000281344	44.25	96.03	-1.1183	0.00045314	0.0062061	0.00437114	0.00655052	0.00498258	0.00929149	0.0134451	0.0134144	HELLPAR	HELLP associated long non-coding RNA [Source:HGNC Symbol;Acc:HGNC:43984]
ENSG00000263513	43.17	98.32	-1.1816	0.00045614	0.0062354	0.582042	0.334278	0.406199	1.1407	1.23943	0.779799	FAM72C	family with sequence similarity 72 member C [Source:HGNC Symbol;Acc:HGNC:30602]
ENSG00000155495	23.47	3.69	2.6404	0.0004563	0.0062354	0.0818838	0.163838	0.160008	0.0235564	0.0142341	0.0289332	MAGEC1	MAGE family member C1 [Source:HGNC Symbol;Acc:HGNC:6812]
ENSG00000101441	90.48	41.97	1.1096	0.00045949	0.0062762	3.25699	2.89634	2.72761	1.10429	1.65807	1.56185	CST4	cystatin S [Source:HGNC Symbol;Acc:HGNC:2476]
ENSG00000165646	45.28	98.16	-1.1212	0.00046905	0.0063864	0.229314	0.338082	0.241738	0.492167	0.572758	0.771178	SLC18A2	solute carrier family 18 member A2 [Source:HGNC Symbol;Acc:HGNC:10935]
ENSG00000267922	75.95	32.14	1.2422	0.00048029	0.0065111	5.0985	7.38988	4.39539	2.49131	2.55459	2.41087	-	novel transcript
ENSG00000140450	146.22	67.64	1.1102	0.00050931	0.0068722	1.37271	0.623072	0.646648	0.401074	0.417589	0.46483	ARRDC4	arrestin domain containing 4 [Source:HGNC Symbol;Acc:HGNC:28087]
ENSG00000212901	158.95	67.93	1.2346	0.0005122	0.0069081	2.89685	4.82266	8.03026	2.91679	2.7052	1.44413	KRTAP3-1	keratin associated protein 3-1 [Source:HGNC Symbol;Acc:HGNC:16778]
ENSG00000259820	66.12	149.61	-1.1752	0.00052755	0.0070939	0.334397	0.33041	0.116686	0.497032	0.813807	0.53499	-	novel transcript
ENSG00000137193	2604.33	875.96	1.572	0.00053936	0.0072323	33.8968	17.4728	11.8556	7.35377	7.50754	7.41005	PIM1	Pim-1 proto-oncogene, serine/threonine kinase [Source:HGNC Symbol;Acc:HGNC:8986]
ENSG00000196260	41.47	12.89	1.6887	0.00054828	0.0073323	0.871971	0.732338	0.933089	0.334466	0.252628	0.239638	SFTA2	surfactant associated 2 [Source:HGNC Symbol;Acc:HGNC:18386]
ENSG00000215866	81.93	35.8	1.1862	0.00055628	0.0074292	0.750769	0.511159	0.626559	0.314974	0.228389	0.322389	LINC01356	long intergenic non-protein coding RNA 1356 [Source:HGNC Symbol;Acc:HGNC:50587]
ENSG00000226622	12.23	0.33	5.1338	0.00057035	0.00757	0.042546	0.0305589	0.0447668	0.0032953	0	0	-	novel transcript
ENSG00000104267	95.91	42.31	1.184	0.00057193	0.0075843	1.6868	0.926482	0.896745	0.524509	0.588597	0.511292	CA2	carbonic anhydrase 2 [Source:HGNC Symbol;Acc:HGNC:1373]
ENSG00000178033	22.79	4.08	2.4679	0.00060895	0.0080115	0.0534123	0.058053	0.0596412	0.0102438	0.00928479	0.012582	CALHM5	calcium homeostasis modulator family member 5 [Source:HGNC Symbol;Acc:HGNC:21568]
ENSG00000198883	16.3	1.31	3.6631	0.00060942	0.0080143	0.116185	0.0753375	0.156087	0	0.0176722	0.0119739	PNMA5	PNMA family member 5 [Source:HGNC Symbol;Acc:HGNC:18743]
ENSG00000225511	22.82	2.38	3.2067	0.000626	0.0081855	0.264541	0.133881	0.0378245	0.0259866	0	0.0212787	LINC00475	long intergenic non-protein coding RNA 475 [Source:HGNC Symbol;Acc:HGNC:23569]
ENSG00000281091	14.29	0.59	4.5023	0.00062852	0.0082019	0.109821	0.151916	0.125182	0.00921472	0	0.00754532	-	novel transcript
ENSG00000125675	8.87	0	5.6313	0.0006286	0.0082019	0.0308794	0.0560644	0.0150852	0	0	0	GRIA3	glutamate ionotropic receptor AMPA type subunit 3 [Source:HGNC Symbol;Acc:HGNC:4573]
ENSG00000262445	28.24	6.05	2.1873	0.00064008	0.0083155	0.772532	0.831171	0.78275	0.115237	0.139265	0.28308	-	novel transcript, antisense to RTN4RL1
ENSG00000225298	22.8	3.22	2.8287	0.00065048	0.00843	0.285186	1.3103	1.15436	0.123064	0.148724	0.134359	LINC00113	long intergenic non-protein coding RNA 113 [Source:HGNC Symbol;Acc:HGNC:1264]
ENSG00000162344	66.28	18.12	1.8647	0.00065532	0.0084804	1.68138	0.411282	0.574305	0.110111	0.299408	0.360651	FGF19	fibroblast growth factor 19 [Source:HGNC Symbol;Acc:HGNC:3675]
ENSG00000126950	12.27	0.26	5.1372	0.00065614	0.0084875	0.16492	0.149714	0.0604253	0	0	0.00849825	TMEM35A	transmembrane protein 35A [Source:HGNC Symbol;Acc:HGNC:25864]
ENSG00000253552	35.34	81.67	-1.202	0.00066373	0.0085746	0.128336	0.147412	0.20152	0.3692	0.479644	0.309871	HOXA-AS2	HOXA cluster antisense RNA 2 [Source:HGNC Symbol;Acc:HGNC:43745]
ENSG00000120738	1846.39	275.36	2.7453	0.00070034	0.0089474	31.1059	7.76335	4.37269	2.38096	2.15323	2.22439	EGR1	early growth response 1 [Source:HGNC Symbol;Acc:HGNC:3238]
ENSG00000285771	58.19	21.93	1.4119	0.00070132	0.0089562	0.840259	1.48198	1.29302	0.38072	0.562348	0.484938	-	novel transcript
ENSG00000163993	1517.56	356.85	2.0884	0.00071373	0.0090915	148.299	39.9174	48.0227	23.2548	17.1065	17.9088	S100P	S100 calcium binding protein P [Source:HGNC Symbol;Acc:HGNC:10504]
ENSG00000268812	113.92	56.3	1.0174	0.00072534	0.0092237	4.57724	2.92734	3.03249	1.48364	2.02188	1.96444	LIF-AS2	LIF antisense RNA 2 [Source:HGNC Symbol;Acc:HGNC:28298]
ENSG00000197632	39.48	10.01	1.9678	0.00072833	0.0092528	0.581223	0.301504	0.177462	0.10973	0.0663045	0.104825	SERPINB2	serpin family B member 2 [Source:HGNC Symbol;Acc:HGNC:8584]
ENSG00000115226	19.71	2.25	3.0317	0.00077973	0.0098363	0.321279	0.173327	0.251122	0.0258792	0	0.0635724	FNDC4	fibronectin type III domain containing 4 [Source:HGNC Symbol;Acc:HGNC:20239]
ENSG00000168209	7275.87	848.55	3.1	0.00078648	0.0098963	188.411	48.9688	15.2725	11.325	8.43775	11.0756	DDIT4	DNA damage inducible transcript 4 [Source:HGNC Symbol;Acc:HGNC:24944]
ENSG00000246859	7.84	35.23	-2.1588	0.00083592	0.010431	0.0214986	0.0306685	0.0105025	0.0487048	0.17004	0.075331	STARD4-AS1	STARD4 antisense RNA 1 [Source:HGNC Symbol;Acc:HGNC:44117]
ENSG00000227440	6.48	29.04	-2.1698	0.00085504	0.010639	0.338676	0.527055	0.2206	2.33022	1.09896	1.62883	ATP5MC1P4	ATP synthase membrane subunit c locus 1 pseudogene 4 [Source:HGNC Symbol;Acc:HGNC:39507]
ENSG00000157514	51.01	16.55	1.6151	0.00086726	0.010751	0.349939	0.216749	0.219431	0.0420714	0.101687	0.124879	TSC22D3	TSC22 domain family member 3 [Source:HGNC Symbol;Acc:HGNC:3051]
ENSG00000187994	82.31	39.1	1.0747	0.00088572	0.010916	0.551064	0.442621	0.445782	0.22075	0.252357	0.244267	RINL	Ras and Rab interactor like [Source:HGNC Symbol;Acc:HGNC:24795]
ENSG00000128917	62.6	23.93	1.4038	0.00089489	0.011016	0.424129	0.29335	0.250681	0.0896274	0.191145	0.107926	DLL4	delta like canonical Notch ligand 4 [Source:HGNC Symbol;Acc:HGNC:2910]
ENSG00000132164	8.18	0	5.5146	0.00090407	0.011115	0.0223587	0.0463934	0.0218454	0	0	0	SLC6A11	solute carrier family 6 member 11 [Source:HGNC Symbol;Acc:HGNC:11044]
ENSG00000233708	8.16	0	5.5118	0.00091169	0.011195	0.152249	0.0789776	0.0743767	0	0	0	-	epidermodysplasia verruciformis 1 (EVER1) pseudogene
ENSG00000263624	22.82	3.96	2.4908	0.0009753	0.01185	0.40443	0.608404	0.35563	0.122164	0.0246061	0.100032	-	novel transcript
ENSG00000131080	30.3	7.49	2.0017	0.00097942	0.011896	0.254709	0.228546	0.13452	0.0415886	0.0502601	0.0681082	EDA2R	ectodysplasin A2 receptor [Source:HGNC Symbol;Acc:HGNC:17756]
ENSG00000268104	8.48	0	5.5671	0.0010048	0.01215	0.0658537	0.011387	0.0589799	0	0	0	SLC6A14	solute carrier family 6 member 14 [Source:HGNC Symbol;Acc:HGNC:11047]
ENSG00000225177	42.16	11.2	1.8975	0.0010071	0.012173	0.660283	0.234868	0.276482	0.151961	0.0573893	0.116654	-	novel transcript
ENSG00000222009	49.6	14.9	1.7126	0.001012	0.012202	0.495025	0.190758	0.345471	0.128168	0.0516308	0.145762	BTBD19	BTB domain containing 19 [Source:HGNC Symbol;Acc:HGNC:27145]
ENSG00000224294	20.04	2.64	2.8572	0.0010215	0.012302	0.279316	0.139097	0.240155	0.0449983	0	0.0460576	PINCR	p53-induced noncoding RNA [Source:HGNC Symbol;Acc:HGNC:53590]
ENSG00000273759	2.04	16.95	-3.0494	0.0010323	0.012393	0.0367691	0.114442	0.0718498	0.6664	0.715866	0.545671	-	novel transcript
ENSG00000075426	5231.04	2034.74	1.3623	0.0010468	0.012517	28.0138	14.2146	11.4576	6.94668	7.45622	7.49062	FOSL2	FOS like 2, AP-1 transcription factor subunit [Source:HGNC Symbol;Acc:HGNC:3798]
ENSG00000160201	151	1089.03	-2.8504	0.0010489	0.012532	0.637181	0.19087	0.170983	4.72817	1.79638	0.982232	U2AF1	U2 small nuclear RNA auxiliary factor 1 [Source:HGNC Symbol;Acc:HGNC:12453]
ENSG00000280614	55.77	0.59	6.5016	0.0010737	0.012757	0.620294	0.0279802	3.71537	0.027155	0	0.0222354	-	novel transcript, similar to YY1 associated myogenesis RNA 1 YAM1
ENSG00000177606	6239.3	2292.64	1.4443	0.0010759	0.012773	67.3833	32.7524	26.4016	16.3497	15.0865	17.2953	JUN	Jun proto-oncogene, AP-1 transcription factor subunit [Source:HGNC Symbol;Acc:HGNC:6204]
ENSG00000089820	75.82	34.45	1.1494	0.0010912	0.012934	0.334579	0.305465	0.357408	0.121278	0.211705	0.143442	ARHGAP4	Rho GTPase activating protein 4 [Source:HGNC Symbol;Acc:HGNC:674]
ENSG00000232656	34.42	77.35	-1.1699	0.0011123	0.013135	0.245358	0.347119	0.167081	0.516553	0.615211	0.649781	IDI2-AS1	IDI2 antisense RNA 1 [Source:HGNC Symbol;Acc:HGNC:30885]
ENSG00000285976	28.53	6.4	2.1265	0.0011579	0.013585	0.126412	0.120221	0.195557	0.0477309	0.0128185	0.0434263	-	novel protein
ENSG00000186226	24.13	4.16	2.4852	0.0011704	0.013704	0.421585	0.397624	0.542967	0.135064	0	0.110595	LCE1E	late cornified envelope 1E [Source:HGNC Symbol;Acc:HGNC:29466]
ENSG00000274979	25.94	69.76	-1.4274	0.0012409	0.014368	0.0843979	0.218903	0.0595546	0.283263	0.382263	0.347918	-	novel transcript
ENSG00000067082	15972.8	6560.48	1.2837	0.0012457	0.014419	96.9513	57.0655	37.4623	25.9133	28.4497	27.9951	KLF6	Kruppel like factor 6 [Source:HGNC Symbol;Acc:HGNC:2235]
ENSG00000223820	55.18	18.61	1.5677	0.0013158	0.015119	0.757403	0.527055	0.225614	0.213905	0.157351	0.159922	CFL1P1	cofilin 1 pseudogene 1 [Source:HGNC Symbol;Acc:HGNC:28560]
ENSG00000136826	2255.7	800.88	1.494	0.0013312	0.015267	24.4576	12.2288	8.61402	5.24962	6.23668	5.36901	KLF4	Kruppel like factor 4 [Source:HGNC Symbol;Acc:HGNC:6348]
ENSG00000236824	38.07	82.4	-1.1113	0.0013533	0.015467	5.84978	3.48647	4.62102	8.39646	12.7218	10.6721	BCYRN1	brain cytoplasmic RNA 1 [Source:HGNC Symbol;Acc:HGNC:1022]
ENSG00000286018	17.71	48	-1.4435	0.0013599	0.015531	0.476741	0.812573	0.499066	1.50864	1.53315	2.02144	-	novel transcript, antisense to CCT8
ENSG00000248964	19.36	3.16	2.6049	0.0013654	0.015576	0.132057	0.11988	0.217729	0.0332414	0.0200863	0.0272192	-	novel transcript
ENSG00000227308	35.01	10.58	1.7433	0.0013672	0.015591	0.345849	0.227539	0.2967	0.110414	0.102643	0.0625922	LINC02832	long intergenic non-protein coding RNA 2832 [Source:HGNC Symbol;Acc:HGNC:54366]
ENSG00000258545	18.65	2.22	3.1739	0.0013761	0.015674	0.199301	0.0723698	0.272615	0.0200673	0.0485029	0	RHOXF1-AS1	RHOXF1 antisense RNA 1 [Source:HGNC Symbol;Acc:HGNC:51582]
ENSG00000073756	607.07	137.07	2.1479	0.0013881	0.015775	5.19278	1.85546	1.09099	0.603292	0.80641	0.51645	PTGS2	prostaglandin-endoperoxide synthase 2 [Source:HGNC Symbol;Acc:HGNC:9605]
ENSG00000261587	12.93	0.66	4.3169	0.0014022	0.01591	0.133712	0.161844	0.130642	0.0224387	0	0	TMEM249	transmembrane protein 249 [Source:HGNC Symbol;Acc:HGNC:44155]
ENSG00000167653	72.13	34.17	1.0812	0.0014145	0.016026	0.974246	1.084	0.951878	0.483368	0.532611	0.477285	PSCA	prostate stem cell antigen [Source:HGNC Symbol;Acc:HGNC:9500]
ENSG00000212195	9.18	33.24	-1.8537	0.0014411	0.016279	1.90505	0.790582	0.744526	3.83633	4.94532	4.29313	U3	Small nucleolar RNA U3 [Source:RFAM;Acc:RF00012]
ENSG00000241743	10.9	0.33	4.9668	0.001448	0.016344	0.00128769	0.000742194	0.000279583	7.20306e-05	0	0	XACT	X active specific transcript [Source:HGNC Symbol;Acc:HGNC:45056]
ENSG00000269906	52.38	16.17	1.6993	0.0014715	0.016572	3.57739	1.15984	1.01945	0.675379	0.634822	0.553022	-	novel transcript, sense intronic to SAV1
ENSG00000269877	16.73	52.25	-1.642	0.0014731	0.016583	0.446506	1.79506	0.545318	3.54044	3.12409	2.34683	-	novel transcript
ENSG00000262681	7.84	0	5.4539	0.0015213	0.017013	0.0812521	0.0766341	0.0144339	0	0	0	-	novel transcript
ENSG00000235802	17.01	2.36	2.89	0.0015237	0.017032	1.77805	0.95924	0.833869	0.143223	0.259629	0.117276	HCFC1-AS1	HCFC1 antisense RNA 1 [Source:HGNC Symbol;Acc:HGNC:40273]
ENSG00000140297	1408.35	688.43	1.0327	0.001526	0.017052	7.81836	4.12349	4.02974	2.81371	2.72686	2.64622	GCNT3	glucosaminyl (N-acetyl) transferase 3, mucin type [Source:HGNC Symbol;Acc:HGNC:4205]
ENSG00000139289	5954.79	1956.56	1.6057	0.001603	0.017756	41.8667	17.6888	14.4372	8.30382	8.67261	8.51752	PHLDA1	pleckstrin homology like domain family A member 1 [Source:HGNC Symbol;Acc:HGNC:8933]
ENSG00000267288	58.14	21.85	1.4367	0.0016267	0.017977	0.773649	0.477249	0.541378	0.263167	0.330761	0.112055	-	novel transcript, antisense to HEXIM2
ENSG00000189280	43.91	14.22	1.6197	0.0016647	0.018302	1.19411	0.724263	0.466679	0.332954	0.201189	0.272634	GJB5	gap junction protein beta 5 [Source:HGNC Symbol;Acc:HGNC:4287]
ENSG00000172216	2803.88	1075.41	1.3825	0.0016675	0.018319	60.7766	29.2523	22.0597	15.5509	14.4286	15.0549	CEBPB	CCAAT enhancer binding protein beta [Source:HGNC Symbol;Acc:HGNC:1834]
ENSG00000176046	43.55	10.19	2.1049	0.0017052	0.018604	0.420301	0.103153	0.0574029	0.0591562	0.0494936	0.0335348	NUPR1	nuclear protein 1, transcriptional regulator [Source:HGNC Symbol;Acc:HGNC:29990]
ENSG00000110375	46.86	16.05	1.5299	0.001715	0.018691	0.797275	0.781204	1.47139	0.312186	0.296433	0.492997	UPK2	uroplakin 2 [Source:HGNC Symbol;Acc:HGNC:12579]
ENSG00000273448	0.68	13.1	-4.2526	0.0017458	0.018981	0.0186183	0.0193161	0	0.187465	0.43045	0.138152	-	novel transcript
ENSG00000260802	28.6	7.88	1.8743	0.0017461	0.018981	0.125562	0.184547	0.132903	0.0421422	0.0509291	0.0345074	SERTM2	serine rich and transmembrane domain containing 2 [Source:HGNC Symbol;Acc:HGNC:48576]
ENSG00000168490	69.69	32.01	1.1268	0.001759	0.019095	0.52559	0.354766	0.420717	0.22316	0.215752	0.187952	PHYHIP	phytanoyl-CoA 2-hydroxylase interacting protein [Source:HGNC Symbol;Acc:HGNC:16865]
ENSG00000159871	15.61	44.16	-1.4988	0.0017664	0.019154	0.0700676	0.0436163	0.100406	0.19754	0.221676	0.219521	LYPD5	LY6/PLAUR domain containing 5 [Source:HGNC Symbol;Acc:HGNC:26397]
ENSG00000196337	36.76	10.54	1.8327	0.0018168	0.019594	0.169038	0.343122	0.28723	0.0370004	0.143089	0.0605943	CGB7	chorionic gonadotropin subunit beta 7 [Source:HGNC Symbol;Acc:HGNC:16451]
ENSG00000246228	100.52	48.04	1.0548	0.0018281	0.01968	0.999109	0.749849	1.39156	0.513695	0.400936	0.665999	CASC8	cancer susceptibility 8 [Source:HGNC Symbol;Acc:HGNC:45129]
ENSG00000083814	4.43	22.04	-2.3196	0.0018337	0.019719	0.0140955	0.0511834	0.0275438	0.177407	0.128639	0.17432	ZNF671	zinc finger protein 671 [Source:HGNC Symbol;Acc:HGNC:26279]
ENSG00000007350	14.29	1.06	3.5858	0.001837	0.019748	0.112956	0.102541	0.082772	0	0	0.0232822	TKTL1	transketolase like 1 [Source:HGNC Symbol;Acc:HGNC:11835]
ENSG00000203362	61.54	21.15	1.5343	0.0018986	0.02028	2.53956	0.965202	1.05637	0.835468	0.30596	0.497534	POLH-AS1	POLH antisense RNA 1 [Source:HGNC Symbol;Acc:HGNC:40459]
ENSG00000165923	19.41	50.42	-1.3807	0.0019576	0.020813	0.113499	0.0942027	0.0532289	0.196563	0.232023	0.280731	AGBL2	ATP/GTP binding protein like 2 [Source:HGNC Symbol;Acc:HGNC:26296]
ENSG00000196208	65.27	30.02	1.1246	0.0019866	0.021066	0.144166	0.1101	0.131075	0.0584666	0.0682209	0.0594303	GREB1	growth regulating estrogen receptor binding 1 [Source:HGNC Symbol;Acc:HGNC:24885]
ENSG00000275882	21.12	164.64	-2.9633	0.0019979	0.021147	0.417585	0.673923	0.362664	7.17117	0.536358	4.0358	IKBKGP1	inhibitor of nuclear factor kappa B kinase subunit gamma pseudogene 1 [Source:HGNC Symbol;Acc:HGNC:24455]
ENSG00000234546	52.36	20.15	1.3565	0.0020095	0.021238	0.6976	0.506622	0.590706	0.234134	0.155624	0.335504	LNCTAM34A	long non coding transcriptional activator of miR34a [Source:HGNC Symbol;Acc:HGNC:52548]
ENSG00000156510	72.73	24.19	1.5866	0.0020312	0.021444	0.842921	0.165118	0.253405	0.142443	0.143453	0.155516	HKDC1	hexokinase domain containing 1 [Source:HGNC Symbol;Acc:HGNC:23302]
ENSG00000287620	1.36	14.47	-3.4075	0.0020511	0.02162	0.0596947	0	0.0194414	0.400704	0.290552	0.196866	-	novel transcript
ENSG00000128965	3380.03	491.37	2.7821	0.0020705	0.021768	80.261	35.131	6.15441	5.95134	5.74493	6.76438	CHAC1	ChaC glutathione specific gamma-glutamylcyclotransferase 1 [Source:HGNC Symbol;Acc:HGNC:28680]
ENSG00000198932	53.75	18.01	1.5545	0.0020733	0.021781	0.168665	0.209223	0.204199	0.0221512	0.062463	0.120921	GPRASP1	G protein-coupled receptor associated sorting protein 1 [Source:HGNC Symbol;Acc:HGNC:24834]
ENSG00000126368	1404.92	492.13	1.5132	0.0021105	0.02211	22.5265	8.60201	8.09164	4.71738	4.54927	5.15033	NR1D1	nuclear receptor subfamily 1 group D member 1 [Source:HGNC Symbol;Acc:HGNC:7962]
ENSG00000235698	29.61	66.06	-1.1601	0.0021252	0.022226	0.456366	0.753249	0.608029	1.67094	1.16112	1.40242	PA2G4P2	proliferation-associated 2G4 pseudogene 2 [Source:HGNC Symbol;Acc:HGNC:16531]
ENSG00000059728	1844.49	820.4	1.1687	0.0021323	0.022292	10.7316	6.00607	4.61838	3.03089	3.34331	3.58374	MXD1	MAX dimerization protein 1 [Source:HGNC Symbol;Acc:HGNC:6761]
ENSG00000283265	21.02	3.42	2.6004	0.0021442	0.02237	0.193133	0.289426	0.838661	0.0864277	0.0522243	0.0884624	-	novel transcript
ENSG00000142686	31.3	75.23	-1.2648	0.0021531	0.022455	0.0979705	0.338809	0.319071	0.550768	0.685476	0.666384	C1orf216	chromosome 1 open reading frame 216 [Source:HGNC Symbol;Acc:HGNC:26800]
ENSG00000122481	35.77	77.29	-1.1072	0.0021635	0.02254	0.503796	0.576287	0.290289	0.975508	1.24178	0.873331	RWDD3	RWD domain containing 3 [Source:HGNC Symbol;Acc:HGNC:21393]
ENSG00000120129	1027.26	333.29	1.6241	0.0021725	0.022625	22.1474	8.37763	6.95926	4.44504	4.37875	3.92522	DUSP1	dual specificity phosphatase 1 [Source:HGNC Symbol;Acc:HGNC:3064]
ENSG00000158296	43.17	15.24	1.4992	0.0021936	0.022798	0.115111	0.179138	0.228952	0.0496728	0.0700349	0.0745685	SLC13A3	solute carrier family 13 member 3 [Source:HGNC Symbol;Acc:HGNC:14430]
ENSG00000286389	22.43	5.19	2.1208	0.0022316	0.023129	0.139325	0.102387	0.141798	0.0292258	0.0353196	0.0287173	-	novel transcript
ENSG00000181085	31.93	9.15	1.7936	0.0022467	0.023246	0.30959	0.173618	0.302482	0.109524	0.0509077	0.0758844	MAPK15	mitogen-activated protein kinase 15 [Source:HGNC Symbol;Acc:HGNC:24667]
ENSG00000230897	82.64	40.87	1.0051	0.0022904	0.023657	3.90473	4.55747	4.76886	2.45726	1.71578	2.68278	RPS18P12	ribosomal protein S18 pseudogene 12 [Source:HGNC Symbol;Acc:HGNC:35967]
ENSG00000262202	6.45	25.32	-1.9741	0.0023152	0.023896	0.273546	0.162171	0.305446	1.06237	0.903472	1.09543	-	novel transcript
ENSG00000237090	6.81	0	5.2495	0.0023577	0.024277	0.131409	0.136335	0.110051	0	0	0	MKRN8P	makorin ring finger protein 8, pseudogene [Source:HGNC Symbol;Acc:HGNC:7120]
ENSG00000223855	67.03	27.44	1.2926	0.0024219	0.024836	0.615462	0.341392	0.250059	0.122713	0.215034	0.180866	HRAT92	heart tissue-associated transcript 92 [Source:NCBI gene (formerly Entrezgene);Acc:441307]
ENSG00000002726	75.06	33.96	1.1372	0.0024278	0.024879	0.414221	0.375175	0.661669	0.264808	0.176012	0.249358	AOC1	amine oxidase copper containing 1 [Source:HGNC Symbol;Acc:HGNC:80]
ENSG00000050555	31.32	9.06	1.7969	0.002436	0.024955	0.116959	0.0866731	0.0544159	0.0168234	0.0338853	0.0275511	LAMC3	laminin subunit gamma 3 [Source:HGNC Symbol;Acc:HGNC:6494]
ENSG00000026751	85.02	40.97	1.0383	0.0024698	0.025223	0.412045	0.427489	0.452908	0.248929	0.131614	0.271775	SLAMF7	SLAM family member 7 [Source:HGNC Symbol;Acc:HGNC:21394]
ENSG00000232070	50.33	19.62	1.3593	0.0024907	0.025386	0.507308	0.57417	0.630841	0.348273	0.168356	0.180612	TMEM253	transmembrane protein 253 [Source:HGNC Symbol;Acc:HGNC:32545]
ENSG00000267259	78.63	25.91	1.6081	0.002516	0.025617	1.43327	0.508455	0.207796	0.176901	0.337557	0.228714	ERVE-1	endogenous retrovirus group E member 1 [Source:HGNC Symbol;Acc:HGNC:14602]
ENSG00000137033	23.81	5.79	2.0413	0.002546	0.02587	0.229567	0.158781	0.149531	0.0616392	0.0372457	0.0378542	IL33	interleukin 33 [Source:HGNC Symbol;Acc:HGNC:16028]
ENSG00000230943	41.84	14.37	1.5285	0.0025501	0.025894	0.495994	0.407379	0.373551	0.228895	0.0754423	0.15335	LINC02541	long intergenic non-protein coding RNA 2541 [Source:HGNC Symbol;Acc:HGNC:53574]
ENSG00000134548	15.3	0.53	4.6756	0.0025764	0.026117	0.140928	0.0071322	0.0067167	0	0	0.00566785	SPX	spexin hormone [Source:HGNC Symbol;Acc:HGNC:28139]
ENSG00000196834	7.16	27.99	-1.9601	0.0026177	0.026482	0.0290845	0.0339464	0.0142084	0.0695512	0.159259	0.0869249	POTEI	POTE ankyrin domain family member I [Source:HGNC Symbol;Acc:HGNC:37093]
ENSG00000105655	46.96	18.02	1.3681	0.0027263	0.02735	0.26078	0.442726	0.393771	0.127309	0.125007	0.188944	ISYNA1	inositol-3-phosphate synthase 1 [Source:HGNC Symbol;Acc:HGNC:29821]
ENSG00000077092	45.51	15.1	1.5748	0.0027295	0.027373	0.390526	0.167654	0.342088	0.142371	0.0491589	0.122129	RARB	retinoic acid receptor beta [Source:HGNC Symbol;Acc:HGNC:9865]
ENSG00000281207	11.58	36.69	-1.661	0.0028235	0.028156	0.0881616	0.0645642	0.0253346	0.151429	0.246107	0.192406	SLFNL1-AS1	SLFNL1 antisense RNA 1 [Source:HGNC Symbol;Acc:HGNC:44126]
ENSG00000274414	47.21	15.6	1.6131	0.0028916	0.028721	0.78889	0.232265	0.4583	0.107341	0.259444	0.14942	-	novel transcript
ENSG00000270048	0	6.7	-5.1583	0.0028964	0.028759	0	0	0	0.571803	0.691029	0.702317	-	novel transcript, sense intronic to CCDC92
ENSG00000177675	28.25	7.32	1.9422	0.0029306	0.029031	0.162784	0.118676	0.0859709	0.0575879	0.0160605	0.0253911	CD163L1	CD163 molecule like 1 [Source:HGNC Symbol;Acc:HGNC:30375]
ENSG00000183560	30.61	7.07	2.0904	0.002984	0.029482	0.933099	0.905616	0.882267	0.454608	0	0.198532	IZUMO1R	IZUMO1 receptor, JUNO [Source:HGNC Symbol;Acc:HGNC:32565]
ENSG00000132746	31.26	67.7	-1.1143	0.0030052	0.029624	0.183484	0.183311	0.258948	0.595297	0.405191	0.420214	ALDH3B2	aldehyde dehydrogenase 3 family member B2 [Source:HGNC Symbol;Acc:HGNC:411]
ENSG00000198788	21.77	4.94	2.1144	0.0030737	0.03023	0.0393032	0.0428151	0.044161	0.0138508	0.00478252	0.0113415	MUC2	mucin 2, oligomeric mucus/gel-forming [Source:HGNC Symbol;Acc:HGNC:7512]
ENSG00000147262	6.8	0	5.2483	0.0030959	0.030388	0.0112306	0.0466062	0.0548639	0	0	0	GPR119	G protein-coupled receptor 119 [Source:HGNC Symbol;Acc:HGNC:19060]
ENSG00000126890	6.79	0	5.2458	0.0031179	0.030544	0.250682	0.0520155	0.195941	0	0	0	CTAG2	cancer/testis antigen 2 [Source:HGNC Symbol;Acc:HGNC:2492]
ENSG00000102359	49.05	19.18	1.3608	0.0031888	0.031117	0.197023	0.184302	0.0883603	0.0650423	0.0707437	0.0559217	SRPX2	sushi repeat containing protein X-linked 2 [Source:HGNC Symbol;Acc:HGNC:30668]
ENSG00000171223	2828.31	1253.98	1.1733	0.0031938	0.031145	58.0693	30.1441	25.3711	17.3531	16.072	19.3681	JUNB	JunB proto-oncogene, AP-1 transcription factor subunit [Source:HGNC Symbol;Acc:HGNC:6205]
ENSG00000085563	17.01	42.92	-1.3333	0.0032466	0.031547	0.0697708	0.0683645	0.0568075	0.183434	0.174515	0.156593	ABCB1	ATP binding cassette subfamily B member 1 [Source:HGNC Symbol;Acc:HGNC:40]
ENSG00000212664	58.67	21.93	1.4267	0.0032479	0.031547	1.3007	4.60674	1.92816	0.99353	1.20069	0.850514	-	ribosomal protein L17 (RPL17) pseudogene
ENSG00000285601	15.67	2.1	2.8543	0.0032565	0.031593	0.114432	0.150379	0.0894435	0	0.0185658	0.0314485	-	novel transcript
ENSG00000234338	8.18	28.78	-1.8258	0.0032665	0.03167	0.108702	0.177219	0.0910337	0.484707	0.283438	0.614546	-	Endogenous retrovirus group FC1 Env polyprotein (ERVFC1) pseudogene
ENSG00000259803	6.48	0	5.1776	0.0033149	0.032067	0.0551944	0.0858947	0.0359515	0	0	0	SLC22A31	solute carrier family 22 member 31 [Source:HGNC Symbol;Acc:HGNC:27091]
ENSG00000233052	23.82	5.65	2.0976	0.003321	0.032115	2.63488	1.29488	0.948458	0.418898	0.506241	0.285839	-	novel transcript
ENSG00000099860	1049.29	421.43	1.3162	0.0033375	0.032222	19.6766	9.37359	7.03016	4.75959	5.46865	4.96283	GADD45B	growth arrest and DNA damage inducible beta [Source:HGNC Symbol;Acc:HGNC:4096]
ENSG00000266983	7.48	26.42	-1.8234	0.0033482	0.032306	0.27269	0.28291	0.30449	0.784477	1.09025	1.31683	RANBP3-DT	RANBP3 divergent transcript [Source:HGNC Symbol;Acc:HGNC:55312]
ENSG00000124171	1516.37	671.33	1.1757	0.0034285	0.032932	11.9952	6.89419	4.89535	3.21718	4.27549	3.54453	PARD6B	par-6 family cell polarity regulator beta [Source:HGNC Symbol;Acc:HGNC:16245]
ENSG00000184786	43.61	90.63	-1.056	0.0035224	0.033694	0.245994	0.608587	0.369763	0.647798	1.01312	0.998472	DYNLT2	dynein light chain Tctex-type 2 [Source:HGNC Symbol;Acc:HGNC:11695]
ENSG00000189409	6.83	0	5.2543	0.0035394	0.033813	0.0225784	0.163973	0.04412	0	0	0	MMP23B	matrix metallopeptidase 23B [Source:HGNC Symbol;Acc:HGNC:7171]
ENSG00000223442	0	6.93	-5.1936	0.0036686	0.03487	0	0	0	0.046372	0.336245	0.113913	TH2LCRR	T helper type 2 locus control region associated RNA [Source:HGNC Symbol;Acc:HGNC:40495]
ENSG00000184497	21.08	3.3	2.5844	0.0037199	0.035264	0.115923	0.0424474	0.0532994	0.00686592	0	0.0281102	TMEM255B	transmembrane protein 255B [Source:HGNC Symbol;Acc:HGNC:28297]
ENSG00000113739	12.58	0.66	4.2722	0.0037831	0.035777	0.142609	0.0204075	0.0192186	0.00990282	0	0	STC2	stanniocalcin 2 [Source:HGNC Symbol;Acc:HGNC:11374]
ENSG00000170345	652.45	239.94	1.4432	0.0037883	0.035816	8.56321	3.55853	2.92373	1.60485	2.09159	2.11288	FOS	Fos proto-oncogene, AP-1 transcription factor subunit [Source:HGNC Symbol;Acc:HGNC:3796]
ENSG00000096088	21.41	4.85	2.1871	0.0039869	0.037398	0.344195	0.178548	0.25222	0.0742638	0.0897484	0.0202699	PGC	progastricsin [Source:HGNC Symbol;Acc:HGNC:8890]
ENSG00000183691	0	6.68	-5.1451	0.0040039	0.037546	0	0	0	0.0262039	0.158338	0.0858266	NOG	noggin [Source:HGNC Symbol;Acc:HGNC:7866]
ENSG00000143333	1679.4	693.6	1.2758	0.0040164	0.037629	28.0973	12.5589	10.585	7.41096	7.68573	7.0911	RGS16	regulator of G protein signaling 16 [Source:HGNC Symbol;Acc:HGNC:9997]
ENSG00000197558	43.58	17.43	1.3083	0.0042739	0.039657	0.0519188	0.0599857	0.0403508	0.0201976	0.0172299	0.026267	SSPOP	SCO-spondin, pseudogene [Source:HGNC Symbol;Acc:HGNC:21998]
ENSG00000227218	46.25	15.71	1.5404	0.0042757	0.039662	0.434634	0.450925	0.46326	0.278489	0.0360596	0.162883	-	novel transcript
ENSG00000010295	66.98	32.07	1.0599	0.0042882	0.039716	0.427882	0.266352	0.300018	0.14192	0.171511	0.186764	IFFO1	intermediate filament family orphan 1 [Source:HGNC Symbol;Acc:HGNC:24970]
ENSG00000158406	59.53	27.98	1.1005	0.0043078	0.039848	0.759555	0.644747	0.61843	0.370804	0.378101	0.246697	H4C8	H4 clustered histone 8 [Source:HGNC Symbol;Acc:HGNC:4788]
ENSG00000229621	6.12	0	5.096	0.0043294	0.039987	0.0433105	0.0674006	0.0846322	0	0	0	LINC01822	long intergenic non-protein coding RNA 1822 [Source:HGNC Symbol;Acc:HGNC:52627]
ENSG00000259429	42.85	86.18	-1.0023	0.0043614	0.040184	0.764896	0.459433	0.472001	1.35116	1.37163	0.85191	UBE2Q2P2	ubiquitin conjugating enzyme E2 Q2 pseudogene 2 [Source:HGNC Symbol;Acc:HGNC:37440]
ENSG00000285018	12.59	1.06	3.4108	0.004379	0.040271	0.329462	0.531705	0.50073	0	0	0.120725	-	novel transcript, antisense to FLNA
ENSG00000112245	85.08	42.94	1.0017	0.0044257	0.040614	0.328311	0.401752	0.328998	0.220381	0.230479	0.107579	PTP4A1	protein tyrosine phosphatase 4A1 [Source:HGNC Symbol;Acc:HGNC:9634]
ENSG00000114019	2957.42	1398.41	1.0806	0.0045291	0.041335	16.9665	9.1201	7.4664	5.24569	5.70832	5.67962	AMOTL2	angiomotin like 2 [Source:HGNC Symbol;Acc:HGNC:17812]
ENSG00000273812	0.34	8.91	-4.6194	0.0045959	0.041857	0	0.0105756	0	0.112901	0.0248076	0.142873	-	novel transcript
ENSG00000263742	6.11	0	5.0951	0.0046466	0.042267	2.98712	1.03303	1.94569	0	0	0	MIR3165	microRNA 3165 [Source:HGNC Symbol;Acc:HGNC:38335]
ENSG00000280422	15.01	2.09	2.9078	0.0047321	0.042889	0.121191	0.301761	0.118409	0	0.0589875	0.0199837	-	TEC
ENSG00000286116	21.07	4.08	2.3151	0.0047302	0.042889	0.053278	0.135117	0.1793	0.0119211	0.0144067	0.0488068	-	FAS antisense RNA 1
ENSG00000279452	6.78	25.22	-1.8908	0.0047387	0.042922	0.0618452	0.0641632	0.181276	0.373626	0.451529	0.382421	-	TEC
ENSG00000231083	57.12	27.19	1.0761	0.0047706	0.043173	2.59941	2.23975	2.58278	1.15339	1.39388	1.16238	-	novel transcript
ENSG00000163817	48.99	20.64	1.2442	0.0047777	0.043202	0.11973	0.2135	0.208373	0.0678119	0.0819512	0.0894596	SLC6A20	solute carrier family 6 member 20 [Source:HGNC Symbol;Acc:HGNC:30927]
ENSG00000170379	67.72	32.44	1.0774	0.004859	0.043754	0.271839	0.277999	0.227655	0.156406	0.15594	0.0768422	TCAF2	TRPM8 channel associated factor 2 [Source:HGNC Symbol;Acc:HGNC:26878]
ENSG00000255606	6.14	0	5.1001	0.0049901	0.044714	0.342756	0.355603	0.0837217	0	0	0	-	novel transcript
ENSG00000213626	39.78	15.61	1.3681	0.0050582	0.045257	0.241677	0.188051	0.214662	0.0663655	0.126988	0.0724564	LBH	LBH regulator of WNT signaling pathway [Source:HGNC Symbol;Acc:HGNC:29532]
ENSG00000272482	12.21	1.12	3.3314	0.0050639	0.045281	0.577222	0.523999	1.48042	0.0726494	0	0.178463	-	novel transcript
ENSG00000174307	10.52	0.53	4.1228	0.0050627	0.045281	0.115137	0.0318541	0.0899951	0	0	0.012657	PHLDA3	pleckstrin homology like domain family A member 3 [Source:HGNC Symbol;Acc:HGNC:8934]
ENSG00000168672	3222.32	1330.85	1.2757	0.0050771	0.045373	22.0882	11.7418	7.52031	6.06713	5.82136	5.98804	LRATD2	LRAT domain containing 2 [Source:HGNC Symbol;Acc:HGNC:24166]
ENSG00000251191	19.71	3.81	2.3691	0.0050909	0.045469	0.432081	0.0996169	0.164174	0.0241698	0.0584187	0.059373	LINC00589	long intergenic non-protein coding RNA 589 [Source:HGNC Symbol;Acc:HGNC:32299]
ENSG00000137331	1995.95	705.83	1.4996	0.0051305	0.045761	64.7025	22.5544	21.2765	13.943	12.2282	14.0926	IER3	immediate early response 3 [Source:HGNC Symbol;Acc:HGNC:5392]
ENSG00000271079	6.13	0	5.0989	0.0051339	0.045761	0.0962222	0.0598972	0.0188026	0	0	0	CTAGE15	CTAGE family member 15 [Source:HGNC Symbol;Acc:HGNC:37295]
ENSG00000235523	14.95	2.24	2.735	0.0053561	0.047484	1.72387	0.500775	0.80846	0.277718	0.0839061	0.113702	-	novel transcript
ENSG00000261167	18.04	44	-1.2807	0.0054339	0.048076	0.157685	0.13385	0.0910381	0.331974	0.38375	0.260013	-	novel transcript, overlapping to MRPL3
ENSG00000255585	26.56	59.69	-1.1597	0.0054356	0.048076	0.132107	0.151743	0.0875857	0.237529	0.41336	0.221726	-	forkhead box H1 (FOXH1) pseudogene
ENSG00000280639	0	6.03	-4.9974	0.005485	0.048469	0	0	0	0.0312714	0.0755835	0.0384091	LINC02204	long intergenic non-protein coding RNA 2204 [Source:HGNC Symbol;Acc:HGNC:53070]
ENSG00000220157	8.85	28.57	-1.7015	0.0056144	0.049424	0.284932	0.241864	0.151849	0.625949	0.535829	1.13188	HNRNPA1P12	heterogeneous nuclear ribonucleoprotein A1 pseudogene 12 [Source:HGNC Symbol;Acc:HGNC:39130]
ENSG00000113070	853.33	173.59	2.2974	0.0056442	0.049657	15.4601	3.12672	2.35891	1.35799	1.60061	1.51694	HBEGF	heparin binding EGF like growth factor [Source:HGNC Symbol;Acc:HGNC:3059]
ENSG00000214915	12.95	1.7	2.98	0.005651	0.049703	0.619735	0.910864	0.45413	0	0.188528	0.0851588	-	novel transcript
